# Supplementary material
Source: publisher site journal article supplement (https://www.dovepress.com/article/311541)
Supplement: Supplementary file 1 [file get_supplementary_file.php]

Circulating microRNAs as potential diagnostic biomarkers for poor sleep quality

Su-Jin Baek, Hyo-Jeong Ban, Sang-Min Park, Boyoung Lee, Yoorae Choi, Younghwa Baek, Siwoo Lee, and Seongwon Cha*

Supplementary information:

1. Supplementary Tables (8)
   1. Table S1 Pittsburgh Sleep Quality Index (PSQI)
   2. Table S2 The inclusion and exclusion criteria for sleep disorder and control groups
   3. Table S3 Functional annotation of 59 miRNAs
   4. Table S4 The differentially expressed miRNAs in serum of patients compared with controls
   5. Table S5 Differentially expressed target genes for six miRNAs
   6. Table S6 Functional annotation of target genes
   7. Table S7 A list of target genes significantly correlated with two miRNAs
   8. Table S8 Integrated functional network genes
2. Supplementary Figures (1)
   1. Figure S1 Volcano plot of differentially expressed target genes for six DEmiRs
   2. Figure S2 A dot plot of enriched pathways of differentially expressed target genes for six miRNAs
   3. Figure S3 Volcano plot of circadian rhythm or clock-related target genes for two sleep disorder miRNAs

Table S1. Pittsburgh Sleep Quality Index (PSQI)

| Pittsburgh Sleep Quality Index | | PSQI is a questionnaire designed to assess your sleep quality over the past one month. | | | | | | | | | | |
| --- | --- | --- | --- | --- | --- | --- | --- | --- | --- | --- | --- | --- |
|  | | | | | | | | | | | | |
| 1. During the past month, when have you usually gone to bed at night?  → Based on 24-hour clock (e.g. midnight = (at) 00) at | | | | |  |  |  | |  |  | |  |
|  | | | | | | | | | | | | |
|  | | | | | | | | | | | | |
| 2. During the past month, how long has it usually taken you to fall asleep each night? | | | | |  |  | hr | |  |  | | min |
|  | | | | | | | | | | | | |
|  | | | | | | | | | | | | |
| 3. During the past month, when have you usually gotten up in the morning?  → Based on 24-hour clock (e.g. midnight = (at) 00) at | | | | |  |  |  | |  |  | |  |
|  | | | | | | | | | | | | |
|  | | | | | | | | | | | | |
| 4. During the past month, how many hours of actual sleep did you get at midnight? | | | | |  |  | hr | |  |  | | min |
|  | | | | | | | | | | | | |
| 5. During the past month, how often have you had trouble sleeping because you ... | | | None | Less than once a week | | | | Once or twice a week | | | Three times or more a week | |
|  | a. cannot get to sleep within 30 minutes | | 0□ | 1□ | | | | 2□ | | | 3□ | |
|  | b. wake up in the middle of the night or early morning | | 0□ | 1□ | | | | 2□ | | | 3□ | |
|  | c. have to get up to use the bathroom | | 0□ | 1□ | | | | 2□ | | | 3□ | |
|  | d. cannot breathe comfortably | | 0□ | 1□ | | | | 2□ | | | 3□ | |
|  | e. cough or snore loudly | | 0□ | 1□ | | | | 2□ | | | 3□ | |
|  | f. feel too cold | | 0□ | 1□ | | | | 2□ | | | 3□ | |
|  | g. feel too hot | | 0□ | 1□ | | | | 2□ | | | 3□ | |
|  | h. have bad dreams | | 0□ | 1□ | | | | 2□ | | | 3□ | |
|  | i. have pain | | 0□ | 1□ | | | | 2□ | | | 3□ | |
|  | j. ( ) *Please describe it in detail, if there had been a cause other than the above. How often have you had trouble sleeping because of it? *If there is none, check the box corresponding to *None*. | | 0□ | 1□ | | | | 2□ | | | 3□ | |
| 6. During the past month, how would you rate your sleep quality overall? | | | 0□  Very good | 1□  Fairly good | | | | 2□  Fairly bad | | | 3□  Very bad | |
| 7. During the past month, how often have you taken medicine (prescribed or over the counter) to help you sleep? | | | 0□  None | 1□  Less than once a week | | | | 2□  Once or twice a week | | | 3□  Three or more times a week | |
| 8. During the past month, how often have you had trouble staying awake while driving, eating meals, or engaging in social activity? | | | 0□  None | 1□  Less than once a week | | | | 2□  Once or twice a week | | | 3□  Three or more times a week | |
| 9. During the past month, how much of a problem has it been for you to keep up enough enthusiasm to get things done? | | | 0□  No problem at all | 1□  Only a very slight problem | | | | 2□  Somewhat of a problem | | | 3□  A very big problem | |

Table S2. The inclusion and exclusion criteria for sleep disorder and control groups

A. Inclusion criteria for sleep disorder (Case) group

- An individual aged above or equal to 35 and below 45 (17 men and 23 women)
- An individual who experiences one of the following problems three times or more a week: requires 30 min or more for falling asleep; requires 30 min or more for falling back to sleep after having woken up; has difficulty maintaining sleep
- An individual with a score of Insomnia Severity Index (ISI) ≥ 8 and ≤ 21
- An individual with a score of Pittsburgh sleep Quality Index (PSQI) above 5
- An individual with a score of Mibyeong Questionnaire (MQ) ≥ 14
- An individual with a regular job

B. Exclusion criteria for sleep disorder group

- An individual who received a medical or oriental medicinal treatment for sleep disturbance within the past one month
- An individual who has been on medication or therapy for a neurological or psychological disorder (depression, anxiety disorder, dementia, etc.) within the past one month
- An individual diagnosed with a disorder that may cause insomnia (sleep apnea, somnosis, restless legs syndrome, etc.)
- An individual with a history of alcohol abuse or dependency within the past six months
- An individual whose current job requires night work, shift work, or heavy redundancy
- An individual who has not complained about sleep disturbance on the MQ
- An individual who is pregnant, lactating, or planning pregnancy within the coming six months
- An individual on medication that may influence the study or deemed unable to comply with the study requirements

C. Inclusion criteria for Control group

- An individual aged above or equal to 30 and below or equal to 49 (men and women)
- An individual with subjective good health (who responded 'Extremely good,' 'Very good,' or 'good' in the subjective health questionnaire)
- An individual belonging to the healthy group on the MQ
- An individual with two or less items on the diagnostic criteria for metabolic syndrome screening test (Diagnostic criteria for metabolic syndrome: NECP ATPIII Guideline (2001); for abdominal obesity: Criteria of the Korean Society for the Study of Obesity)
- An individual who submitted the result of the health checkup by the National Health Insurance Service performed within the past two years (or a health checkup report comprising identical items to the above)
- An individual corresponding to one of the following cases based on the health checkup result within the past two years:

i) Normal A or Normal B overall;

ii) Within the range of Normal A or Normal B in terms of blood pressure, glucose, total cholesterol, HDL cholesterol, triglyceride, and LDL cholesterol, despite having hypertension, diabetes, or dyslipidemia, due to medication treatment

- An individual who can write in the questionnaire and in whom biomarkers can be measured

D. Exclusion criteria for Control group

- An individual diagnosed with one of the following diseases at a medical institution

(This includes anyone who is currently receiving a treatment; still has the disease despite past treatment; was diagnosed but never received a treatment)

- An individual who has been on medication or therapy for an internal, neurological, or mental disorder within the past month (except the medication for hypertension, diabetes, and dyslipidemia)
- An individual who is pregnant, lactating, or planning pregnancy within the coming six months
- An individual deemed unable to comply with the study requirements by the principal investigator

The participants in our study were in their 30s and 40s, and they belonged to the early middle-aged group, who often experience problems related to sleep, such as insufficient sleep duration and poor sleep quality.1,2 Insomnia Severity Index (ISI) score is interpreted as follows: absence of insomnia (0-7); sub-threshold insomnia (8-14); moderate insomnia (15-21); and severe insomnia (22-28).3 Therefore, the subjects in the poor sleep quality group can suffer from sub-threshold or moderate insomnia. Mibyeong Questionnaire (MQ), the in-house questionnaire developed by our group, was designed to measure the health status of healthy but unsatisfied people using seven symptoms (fatigue, pain, sleep disturbance, indigestion, anxiety, anger, and depression).4 MQ score is interpreted as follows: healthy (0), slight Mibyeong state (1-13), and severe Mibyeong state (≥14). For the assessment of poor sleep quality, we included only those participants who had regular jobs to exclude the factors related to certain jobs that require an irregular sleep pattern.

Table S3. Functional annotation of 59 miRNAs

| Term | Count | P-value | FDR | miRNA |
| --- | --- | --- | --- | --- |
| Hematopoiesis | 15 | 8.71E-08 | 4.56E-05 | hsa-mir-125a,hsa-let-7a-2,hsa-let-7b,hsa-mir-486-2,hsa-mir-92a-1,hsa-let-7e,hsa-mir-486-1,hsa-let-7a-3,hsa-let-7d,hsa-let-7g,hsa-mir-378a,hsa-mir-99a,hsa-let-7a-1,hsa-mir-92a-2,hsa-mir-150 |
| mir-3180 family | 5 | 4.41E-07 | 5.77E-05 | hsa-mir-3180-1,hsa-mir-3180-2,hsa-mir-3180-3,hsa-mir-3180-4,hsa-mir-3180-5 |
| T-Cell Differentiation | 8 | 4.99E-07 | 5.80E-05 | hsa-let-7a-2,hsa-let-7b,hsa-let-7e,hsa-let-7a-1,hsa-mir-10a,hsa-let-7d,hsa-mir-150,hsa-let-7g |
| Human Immunodeficiency Virus Infection | 13 | 3.97E-07 | 5.94E-05 | hsa-let-7a-2,hsa-let-7b,hsa-mir-92a-1,hsa-let-7e,hsa-let-7d,hsa-mir-146b,hsa-mir-1290,hsa-mir-122,hsa-mir-183,hsa-let-7a-1,hsa-mir-92a-2,hsa-mir-150,hsa-let-7g |
| Adipocyte Differentiation | 13 | 6.40E-08 | 6.70E-05 | hsa-let-7a-2,hsa-let-7b,hsa-mir-26b,hsa-mir-92a-1,hsa-let-7e,hsa-let-7a-3,hsa-let-7d,hsa-let-7g,hsa-mir-378a,hsa-mir-375,hsa-let-7a-1,hsa-mir-92a-2,hsa-mir-192 |
| let-7 family | 7 | 7.13E-07 | 7.47E-05 | hsa-let-7a-1,hsa-let-7a-2,hsa-let-7a-3,hsa-let-7b,hsa-let-7d,hsa-let-7e,hsa-let-7g |
| Liver Diseases [unspecific] | 10 | 1.10E-06 | 1.05E-04 | hsa-mir-125a,hsa-let-7a-2,hsa-let-7b,hsa-let-7e,hsa-let-7a-3,hsa-let-7d,hsa-mir-146b,hsa-mir-122,hsa-let-7a-1,hsa-let-7g |
| EIF2C2 | 7 | 3.10E-07 | 1.08E-04 | hsa-let-7a-2,hsa-let-7b,hsa-let-7a-3,hsa-let-7e,hsa-let-7a-1,hsa-let-7d,hsa-let-7g |
| LIN28 | 7 | 3.10E-07 | 1.08E-04 | hsa-let-7a-2,hsa-let-7b,hsa-let-7a-3,hsa-let-7e,hsa-let-7a-1,hsa-let-7d,hsa-let-7g |
| LIN28B | 7 | 3.10E-07 | 1.08E-04 | hsa-let-7a-2,hsa-let-7b,hsa-let-7a-3,hsa-let-7e,hsa-let-7a-1,hsa-let-7d,hsa-let-7g |
| TRIM32 | 7 | 3.10E-07 | 1.08E-04 | hsa-let-7a-2,hsa-let-7b,hsa-let-7a-3,hsa-let-7e,hsa-let-7a-1,hsa-let-7d,hsa-let-7g |
| Aging | 14 | 2.51E-06 | 2.19E-04 | hsa-let-7a-2,hsa-let-7b,hsa-mir-148a,hsa-mir-92a-1,hsa-mir-543,hsa-let-7e,hsa-let-7a-3,hsa-let-7d,hsa-mir-146b,hsa-mir-10a,hsa-mir-122,hsa-let-7a-1,hsa-mir-92a-2,hsa-let-7g |
| Myeloproliferative Neoplasms(DOWN) | 4 | 8.52E-06 | 6.86E-04 | hsa-let-7a-2,hsa-let-7a-3,hsa-mir-375,hsa-let-7a-1 |
| Carcinoma, Hepatocellular(DOWN) | 21 | 1.20E-05 | 8.94E-04 | hsa-mir-122,hsa-mir-433,hsa-let-7g,hsa-mir-361,hsa-mir-150,hsa-mir-1285-1,hsa-let-7a-2,hsa-mir-486-1,hsa-mir-296,hsa-mir-370,hsa-mir-375,hsa-mir-1285-2,hsa-mir-1290,hsa-mir-26b,hsa-let-7a-1,hsa-mir-486-2,hsa-let-7a-3,hsa-mir-342,hsa-mir-192,hsa-let-7b,hsa-mir-485 |
| Carcinoma, Lung(UP) | 15 | 1.39E-05 | 9.73E-04 | hsa-mir-122,hsa-mir-26b,hsa-let-7a-1,hsa-mir-25,hsa-mir-328,hsa-let-7g,hsa-let-7b,hsa-let-7d,hsa-mir-150,hsa-mir-378a,hsa-mir-375,hsa-let-7e,hsa-mir-183,hsa-let-7a-2,hsa-mir-192 |
| Cholesterol Metabolism | 5 | 2.17E-05 | 1.42E-03 | hsa-mir-486-2,hsa-mir-92a-1,hsa-mir-486-1,hsa-mir-92a-2,hsa-mir-122 |
| MYC | 10 | 2.89E-05 | 1.59E-03 | hsa-let-7a-2,hsa-let-7b,hsa-mir-26b,hsa-mir-92a-1,hsa-let-7e,hsa-let-7a-3,hsa-let-7d,hsa-let-7a-1,hsa-mir-92a-2,hsa-let-7g |
| Hemoglobin Diseases | 6 | 2.84E-05 | 1.75E-03 | hsa-let-7a-2,hsa-let-7b,hsa-let-7e,hsa-let-7a-1,hsa-let-7d,hsa-let-7g |
| Acute Coronary Syndrome(UP) | 6 | 2.84E-05 | 1.75E-03 | hsa-mir-122,hsa-mir-125a,hsa-mir-486-1,hsa-mir-92a-2,hsa-mir-92a-1,hsa-mir-486-2 |
| ZEB1 | 6 | 4.75E-05 | 2.37E-03 | hsa-let-7a-2,hsa-let-7b,hsa-let-7e,hsa-let-7a-1,hsa-let-7d,hsa-let-7g |
| Macular Degeneration(UP) | 5 | 4.68E-05 | 2.45E-03 | hsa-let-7a-2,hsa-let-7b,hsa-let-7d,hsa-let-7a-1,hsa-let-7a-3 |
| Epithelial-to-Mesenchymal Transition | 14 | 7.62E-05 | 3.47E-03 | hsa-mir-125a,hsa-let-7a-2,hsa-let-7b,hsa-mir-486-2,hsa-mir-1246,hsa-mir-26b,hsa-let-7e,hsa-mir-486-1,hsa-let-7a-3,hsa-let-7d,hsa-mir-370,hsa-mir-375,hsa-let-7a-1,hsa-mir-192 |
| Pleural Mesothelioma(UP) | 6 | 7.58E-05 | 3.61E-03 | hsa-let-7a-2,hsa-mir-26b,hsa-mir-125a,hsa-let-7a-1,hsa-mir-25,hsa-let-7a-3 |
| Cardiovascular Diseases [unspecific] | 12 | 9.42E-05 | 4.11E-03 | hsa-let-7a-2,hsa-let-7b,hsa-mir-148a,hsa-mir-26b,hsa-mir-92a-1,hsa-let-7a-3,hsa-mir-378a,hsa-mir-122,hsa-mir-99a,hsa-let-7a-1,hsa-mir-92a-2,hsa-mir-150 |
| Acute Coronary Syndrome | 7 | 9.90E-05 | 4.15E-03 | hsa-mir-125a,hsa-mir-486-2,hsa-mir-92a-1,hsa-let-7e,hsa-mir-486-1,hsa-mir-122,hsa-mir-92a-2 |
| Rhinosinusitis(DOWN) | 4 | 1.17E-04 | 4.73E-03 | hsa-mir-26b,hsa-mir-1290,hsa-mir-92a-2,hsa-mir-92a-1 |
| Carcinoma, Pancreatic(DOWN) | 13 | 1.66E-04 | 4.97E-03 | hsa-let-7a-1,hsa-mir-99a,hsa-let-7g,hsa-let-7b,hsa-let-7d,hsa-mir-150,hsa-mir-375,hsa-let-7e,hsa-mir-148a,hsa-mir-183,hsa-let-7a-2,hsa-mir-125a,hsa-mir-192 |
| Diabetes Mellitus, Gestational | 7 | 1.36E-04 | 5.09E-03 | hsa-let-7a-2,hsa-mir-148a,hsa-mir-92a-1,hsa-let-7a-3,hsa-let-7a-1,hsa-mir-92a-2,hsa-let-7g |
| Hepatitis C Virus Infection | 14 | 1.31E-04 | 5.10E-03 | hsa-let-7d,hsa-mir-99a,hsa-let-7a-2,hsa-let-7b,hsa-mir-122,hsa-mir-192,hsa-let-7g,hsa-mir-125a,hsa-mir-26b,hsa-mir-148a,hsa-let-7e,hsa-mir-25,hsa-mir-629,hsa-let-7a-1 |
| Cholesteatoma(DOWN) | 3 | 1.62E-04 | 5.13E-03 | hsa-let-7a-2,hsa-let-7a-3,hsa-let-7a-1 |
| FLI1 | 3 | 1.62E-04 | 5.13E-03 | hsa-let-7a-3,hsa-let-7a-2,hsa-let-7a-1 |
| Kidney Transplant Rejection | 5 | 1.57E-04 | 5.31E-03 | hsa-mir-99a,hsa-mir-486-2,hsa-mir-486-1,hsa-mir-192,hsa-mir-150 |
| Breast Neoplasms(DOWN) | 5 | 1.57E-04 | 5.31E-03 | hsa-let-7a-2,hsa-mir-125a,hsa-let-7a-1,hsa-mir-183,hsa-let-7a-3 |
| Liver Cirrhosis | 11 | 1.47E-04 | 5.32E-03 | hsa-let-7a-2,hsa-mir-92a-1,hsa-let-7a-3,hsa-mir-1285-2,hsa-mir-370,hsa-mir-378a,hsa-mir-122,hsa-mir-1285-1,hsa-let-7a-1,hsa-mir-92a-2,hsa-mir-939 |
| Squamous Cell Carcinoma, Oral(DOWN) | 10 | 1.57E-04 | 5.48E-03 | hsa-mir-26b,hsa-mir-433,hsa-let-7a-1,hsa-mir-99a,hsa-let-7g,hsa-let-7d,hsa-mir-375,hsa-let-7a-3,hsa-let-7a-2,hsa-mir-125a |
| Asthma | 9 | 2.29E-04 | 6.66E-03 | hsa-let-7a-2,hsa-let-7b,hsa-mir-148a,hsa-let-7e,hsa-let-7a-3,hsa-let-7d,hsa-let-7g,hsa-mir-122,hsa-let-7a-1 |
| Liver Cirrhosis(DOWN) | 6 | 2.47E-04 | 6.98E-03 | hsa-mir-122,hsa-let-7a-2,hsa-mir-370,hsa-let-7a-1,hsa-mir-378a,hsa-let-7a-3 |
| Liver Injury(DOWN) | 4 | 2.63E-04 | 7.05E-03 | hsa-mir-122,hsa-let-7a-2,hsa-let-7b,hsa-let-7a-1 |
| Diabetes Mellitus, Gestational(UP) | 5 | 2.58E-04 | 7.11E-03 | hsa-let-7a-2,hsa-let-7g,hsa-let-7a-1,hsa-mir-148a,hsa-let-7a-3 |
| Carcinoma, Lung. Non-Small-Cell(UP) | 12 | 4.08E-04 | 0.0102 | hsa-mir-25,hsa-mir-543,hsa-mir-150,hsa-mir-375,hsa-mir-486-2,hsa-mir-1285-1,hsa-mir-10a,hsa-mir-125a,hsa-mir-1285-2,hsa-mir-1290,hsa-mir-486-1,hsa-mir-1246 |
| Heart Failure | 16 | 4.06E-04 | 0.0104 | hsa-let-7d,hsa-mir-375,hsa-let-7a-2,hsa-let-7b,hsa-let-7a-3,hsa-mir-378a,hsa-mir-122,hsa-mir-192,hsa-mir-150,hsa-mir-125a,hsa-mir-342,hsa-mir-148a,hsa-let-7e,hsa-mir-25,hsa-let-7a-1,hsa-mir-328 |
| Dengue Virus Infection(DOWN) | 5 | 4.02E-04 | 0.0105 | hsa-let-7a-2,hsa-let-7a-1,hsa-mir-150,hsa-mir-378a,hsa-let-7a-3 |
| Autoimmune Diseases [unspecific] | 8 | 4.87E-04 | 0.0116 | hsa-mir-125a,hsa-let-7a-2,hsa-mir-92a-1,hsa-let-7a-3,hsa-mir-10a,hsa-let-7a-1,hsa-mir-92a-2,hsa-mir-150 |
| Angiogenesis | 11 | 5.05E-04 | 0.0117 | hsa-let-7b,hsa-mir-486-2,hsa-mir-1246,hsa-mir-92a-1,hsa-mir-486-1,hsa-mir-370,hsa-mir-378a,hsa-mir-122,hsa-mir-92a-2,hsa-mir-296,hsa-mir-150 |
| Lipid Metabolism | 9 | 4.86E-04 | 0.0118 | hsa-mir-125a,hsa-mir-92a-1,hsa-mir-370,hsa-mir-378a,hsa-mir-122,hsa-mir-375,hsa-mir-92a-2,hsa-mir-296,hsa-mir-192 |
| Glucose Metabolism | 7 | 5.28E-04 | 0.012 | hsa-let-7a-2,hsa-let-7b,hsa-let-7e,hsa-let-7d,hsa-mir-375,hsa-let-7a-1,hsa-let-7g |
| Cell Differentiation | 10 | 6.02E-04 | 0.0124 | hsa-mir-125a,hsa-let-7a-2,hsa-let-7b,hsa-let-7e,hsa-let-7a-3,hsa-let-7d,hsa-mir-183,hsa-let-7a-1,hsa-mir-150,hsa-let-7g |
| Carcinoma, Thyroid, Follicular(UP) | 3 | 6.22E-04 | 0.0125 | hsa-mir-183,hsa-mir-146b,hsa-mir-375 |
| mir-25 family | 3 | 6.22E-04 | 0.0125 | hsa-mir-25,hsa-mir-92a-1,hsa-mir-92a-2 |
| Multiple Sclerosis | 9 | 6.84E-04 | 0.0126 | hsa-let-7a-2,hsa-mir-92a-1,hsa-let-7a-3,hsa-mir-146b,hsa-mir-122,hsa-mir-629,hsa-mir-3614,hsa-let-7a-1,hsa-mir-92a-2 |
| Cell Death | 12 | 6.78E-04 | 0.0127 | hsa-let-7a-2,hsa-let-7b,hsa-mir-92a-1,hsa-let-7e,hsa-let-7a-3,hsa-let-7d,hsa-mir-25,hsa-mir-183,hsa-let-7a-1,hsa-mir-92a-2,hsa-mir-939,hsa-let-7g |
| Acute Myocardial Infarction | 9 | 5.78E-04 | 0.0129 | hsa-mir-486-2,hsa-mir-26b,hsa-mir-92a-1,hsa-mir-486-1,hsa-mir-122,hsa-mir-99a,hsa-mir-328,hsa-mir-92a-2,hsa-mir-150 |
| EGR1 | 7 | 6.66E-04 | 0.0129 | hsa-mir-125a,hsa-mir-148a,hsa-let-7e,hsa-mir-146b,hsa-mir-642a,hsa-mir-10a,hsa-mir-183 |
| Carcinoma, Breast(DOWN) | 17 | 6.78E-04 | 0.0129 | hsa-let-7g,hsa-mir-361,hsa-mir-146b,hsa-let-7a-2,hsa-mir-378a,hsa-mir-296,hsa-let-7d,hsa-let-7e,hsa-mir-1290,hsa-mir-26b,hsa-let-7a-1,hsa-mir-328,hsa-mir-99a,hsa-mir-148a,hsa-mir-192,hsa-let-7b,hsa-mir-485 |
| Macular Degeneration | 5 | 5.99E-04 | 0.0131 | hsa-let-7a-2,hsa-let-7b,hsa-let-7a-3,hsa-let-7a-1,hsa-let-7d |
| Myasthenia Gravis | 5 | 5.99E-04 | 0.0131 | hsa-let-7a-2,hsa-let-7a-1,hsa-mir-192,hsa-mir-150,hsa-mir-122 |
| Mandibular Prognathism | 5 | 5.99E-04 | 0.0131 | hsa-mir-629,hsa-mir-342,hsa-mir-10a,hsa-mir-192,hsa-mir-150 |
| Carcinoma, Thyroid(DOWN) | 6 | 8.32E-04 | 0.0148 | hsa-let-7a-1,hsa-mir-150,hsa-mir-148a,hsa-let-7a-3,hsa-let-7a-2,hsa-mir-125a |
| Neoplasms [unspecific](UP) | 13 | 8.23E-04 | 0.0149 | hsa-let-7g,hsa-mir-150,hsa-mir-629,hsa-mir-183,hsa-let-7a-2,hsa-mir-296,hsa-let-7d,hsa-let-7e,hsa-let-7a-1,hsa-let-7a-3,hsa-mir-92a-1,hsa-mir-92a-2,hsa-let-7b |
| Dengue Virus Infection | 5 | 8.60E-04 | 0.015 | hsa-let-7a-2,hsa-let-7a-1,hsa-mir-378a,hsa-let-7a-3,hsa-mir-150 |
| Liver Injury | 5 | 8.60E-04 | 0.015 | hsa-let-7a-2,hsa-let-7b,hsa-let-7a-1,hsa-mir-192,hsa-mir-122 |
| Immune Response | 13 | 9.18E-04 | 0.0155 | hsa-mir-92a-1,hsa-mir-486-1,hsa-mir-146b,hsa-mir-92a-2,hsa-mir-192,hsa-mir-150,hsa-let-7g,hsa-mir-370,hsa-mir-486-2,hsa-mir-342,hsa-mir-148a,hsa-mir-25,hsa-mir-328 |
| Atrial Fibrillation | 10 | 1.07E-03 | 0.0178 | hsa-mir-486-2,hsa-mir-26b,hsa-mir-486-1,hsa-mir-146b,hsa-mir-25,hsa-mir-10a,hsa-mir-183,hsa-mir-328,hsa-mir-192,hsa-mir-150 |
| Carcinoma, Gastric(UP) | 15 | 1.21E-03 | 0.0197 | hsa-mir-433,hsa-mir-629,hsa-mir-183,hsa-let-7a-2,hsa-mir-486-1,hsa-mir-25,hsa-mir-543,hsa-let-7a-1,hsa-mir-486-2,hsa-mir-148a,hsa-let-7a-3,hsa-mir-92a-1,hsa-mir-192,hsa-mir-92a-2,hsa-mir-125a |
| Crohn Disease | 7 | 1.53E-03 | 0.0229 | hsa-let-7b,hsa-let-7e,hsa-let-7d,hsa-mir-361,hsa-mir-122,hsa-mir-99a,hsa-mir-192 |
| Diabetes Mellitus, Type 2 | 17 | 1.45E-03 | 0.0233 | hsa-mir-92a-1,hsa-mir-486-1,hsa-let-7d,hsa-mir-146b,hsa-mir-375,hsa-let-7a-2,hsa-let-7b,hsa-let-7a-3,hsa-mir-122,hsa-mir-92a-2,hsa-mir-192,hsa-mir-150,hsa-let-7g,hsa-mir-486-2,hsa-mir-148a,hsa-let-7e,hsa-let-7a-1 |
| Diabetes Mellitus | 11 | 1.59E-03 | 0.0234 | hsa-let-7a-2,hsa-mir-486-2,hsa-mir-342,hsa-mir-26b,hsa-mir-92a-1,hsa-mir-486-1,hsa-let-7a-3,hsa-mir-370,hsa-mir-375,hsa-let-7a-1,hsa-mir-92a-2 |
| Cell Division | 5 | 1.63E-03 | 0.0236 | hsa-let-7a-2,hsa-let-7b,hsa-let-7a-3,hsa-let-7a-1,hsa-let-7d |
| Cerebral Cavernous Malformations | 3 | 1.49E-03 | 0.0237 | hsa-mir-361,hsa-let-7b,hsa-mir-370 |
| Kaposi's Sarcoma(DOWN) | 3 | 1.49E-03 | 0.0237 | hsa-let-7a-2,hsa-let-7a-3,hsa-let-7a-1 |
| Cerebral Aneurysm(DOWN) | 3 | 1.49E-03 | 0.0237 | hsa-mir-92a-2,hsa-mir-370,hsa-mir-92a-1 |
| FSH | 3 | 1.49E-03 | 0.0237 | hsa-let-7a-3,hsa-let-7a-2,hsa-let-7a-1 |
| Schizophrenia | 9 | 1.71E-03 | 0.0245 | hsa-mir-432,hsa-mir-26b,hsa-mir-92a-1,hsa-mir-146b,hsa-mir-122,hsa-mir-183,hsa-mir-328,hsa-mir-92a-2,hsa-let-7g |
| ACTH-Secreting Pituitary Adenoma | 4 | 2.09E-03 | 0.0296 | hsa-let-7a-2,hsa-let-7a-1,hsa-let-7a-3,hsa-mir-150 |
| Chronic Hepatitis C(DOWN) | 4 | 2.09E-03 | 0.0296 | hsa-mir-122,hsa-let-7a-2,hsa-let-7a-1,hsa-mir-99a |
| Carcinoma, Endometrial(DOWN) | 7 | 2.21E-03 | 0.0304 | hsa-let-7a-1,hsa-mir-543,hsa-let-7g,hsa-let-7b,hsa-let-7d,hsa-let-7e,hsa-let-7a-2 |
| Carcinoma, Cervical(DOWN) | 10 | 2.30E-03 | 0.0313 | hsa-mir-26b,hsa-let-7a-1,hsa-mir-328,hsa-mir-99a,hsa-mir-146b,hsa-mir-183,hsa-mir-342,hsa-let-7a-2,hsa-mir-125a,hsa-mir-1246 |
| Cell Proliferation | 11 | 3.06E-03 | 0.036 | hsa-let-7a-2,hsa-let-7b,hsa-mir-92a-1,hsa-let-7e,hsa-let-7d,hsa-mir-433,hsa-let-7g,hsa-mir-378a,hsa-let-7a-1,hsa-mir-92a-2,hsa-mir-150 |
| Hepatitis B Virus Infection(DOWN) | 6 | 3.23E-03 | 0.0376 | hsa-mir-26b,hsa-mir-370,hsa-let-7a-1,hsa-mir-99a,hsa-let-7a-3,hsa-let-7a-2 |
| Lymphoma, B-Cell(DOWN) | 3 | 2.87E-03 | 0.0385 | hsa-mir-92a-2,hsa-mir-150,hsa-mir-92a-1 |
| Androgenetic Alopecia | 2 | 3.02E-03 | 0.039 | hsa-mir-125a,hsa-mir-485 |
| Lung Injury [unspecific](UP) | 2 | 3.02E-03 | 0.039 | hsa-let-7a-2,hsa-let-7b |
| Atypical Teratoid Tumor(DOWN) | 2 | 3.02E-03 | 0.039 | hsa-let-7a-3,hsa-let-7b |
| hsa-mir-3158-1 cluster | 2 | 3.02E-03 | 0.039 | hsa-mir-3158-1,hsa-mir-3158-2 |
| hsa-mir-486-2 cluster | 2 | 3.02E-03 | 0.039 | hsa-mir-486-2,hsa-mir-486-1 |
| mir-1285 family | 2 | 3.02E-03 | 0.039 | hsa-mir-1285-1,hsa-mir-1285-2 |
| mir-3158 family | 2 | 3.02E-03 | 0.039 | hsa-mir-3158-1,hsa-mir-3158-2 |
| mir-486 family | 2 | 3.02E-03 | 0.039 | hsa-mir-486-1,hsa-mir-486-2 |
| Psoriasis(DOWN) | 4 | 3.01E-03 | 0.0399 | hsa-let-7a-2,hsa-let-7a-1,hsa-let-7a-3,hsa-mir-99a |
| Lung Fibrosis(DOWN) | 4 | 3.01E-03 | 0.0399 | hsa-mir-26b,hsa-mir-486-1,hsa-mir-486-2,hsa-let-7d |
| Adipogenesis | 5 | 3.58E-03 | 0.0412 | hsa-mir-125a,hsa-mir-148a,hsa-mir-26b,hsa-let-7g,hsa-mir-122 |
| Carcinoma, Prostate(DOWN) | 14 | 3.92E-03 | 0.0446 | hsa-mir-122,hsa-let-7g,hsa-mir-361,hsa-mir-146b,hsa-let-7a-2,hsa-mir-378a,hsa-mir-296,hsa-mir-25,hsa-let-7d,hsa-let-7e,hsa-mir-26b,hsa-let-7a-1,hsa-mir-342,hsa-let-7b |
| Carcinoma, Lung. Non-Small-Cell(DOWN) | 13 | 4.22E-03 | 0.0451 | hsa-mir-122,hsa-let-7g,hsa-mir-361,hsa-mir-370,hsa-mir-296,hsa-let-7e,hsa-mir-26b,hsa-mir-99a,hsa-mir-148a,hsa-mir-92a-1,hsa-mir-342,hsa-mir-92a-2,hsa-let-7b |
| Atherosclerosis | 12 | 4.06E-03 | 0.0457 | hsa-mir-92a-1,hsa-mir-146b,hsa-mir-99a,hsa-mir-296,hsa-let-7b,hsa-mir-432,hsa-mir-433,hsa-mir-10a,hsa-mir-378a,hsa-mir-92a-2,hsa-mir-150,hsa-mir-26b |
| Rhinosinusitis | 4 | 4.17E-03 | 0.0465 | hsa-mir-26b,hsa-mir-92a-1,hsa-mir-1290,hsa-mir-92a-2 |
| Mycobacterium Tuberculosis Infection | 4 | 4.17E-03 | 0.0465 | hsa-mir-296,hsa-mir-485,hsa-mir-146b,hsa-mir-150 |
| Chronic Kidney Disease(DOWN) | 4 | 4.17E-03 | 0.0465 | hsa-let-7a-2,hsa-mir-26b,hsa-let-7a-1,hsa-let-7a-3 |
| Carcinoma, Thyroid(UP) | 4 | 4.17E-03 | 0.0465 | hsa-mir-486-1,hsa-mir-146b,hsa-mir-25,hsa-mir-486-2 |
| Carcinoma, Hepatocellular, HBV-Related(DOWN) | 3 | 4.82E-03 | 0.051 | hsa-let-7a-2,hsa-let-7a-1,hsa-let-7a-3 |
| Lupus Nephritis(UP) | 3 | 4.82E-03 | 0.051 | hsa-mir-125a,hsa-mir-148a,hsa-mir-150 |
| Hirschsprung's Disease | 5 | 5.58E-03 | 0.0579 | hsa-let-7a-2,hsa-let-7a-3,hsa-mir-146b,hsa-let-7a-1,hsa-mir-192 |
| Carcinoma, Thyroid, Papillary(UP) | 5 | 5.58E-03 | 0.0579 | hsa-mir-25,hsa-let-7b,hsa-mir-146b,hsa-mir-10a,hsa-mir-183 |
| Inflammation | 13 | 5.84E-03 | 0.0594 | hsa-let-7d,hsa-mir-146b,hsa-mir-122,hsa-mir-192,hsa-mir-150,hsa-let-7g,hsa-mir-125a,hsa-mir-370,hsa-mir-183,hsa-mir-342,hsa-mir-148a,hsa-mir-25,hsa-mir-328 |
| Carcinoma, Breast(UP) | 16 | 6.51E-03 | 0.0649 | hsa-mir-122,hsa-mir-150,hsa-mir-1285-1,hsa-mir-183,hsa-mir-486-1,hsa-mir-378a,hsa-mir-25,hsa-mir-939,hsa-mir-375,hsa-mir-10a,hsa-mir-1285-2,hsa-mir-486-2,hsa-mir-92a-1,hsa-mir-342,hsa-mir-92a-2,hsa-mir-125a |
| Innate Immunity | 7 | 6.51E-03 | 0.0655 | hsa-let-7a-2,hsa-let-7b,hsa-let-7e,hsa-let-7d,hsa-mir-146b,hsa-let-7a-1,hsa-let-7g |
| Osteosarcoma(DOWN) | 12 | 6.80E-03 | 0.0672 | hsa-mir-122,hsa-mir-150,hsa-mir-183,hsa-mir-486-1,hsa-mir-370,hsa-mir-25,hsa-let-7d,hsa-mir-375,hsa-mir-26b,hsa-mir-328,hsa-mir-486-2,hsa-mir-192 |
| Alcoholic Cardiomyopathy | 3 | 7.41E-03 | 0.0725 | hsa-mir-485,hsa-mir-1285-1,hsa-mir-1285-2 |
| mir-10 family | 3 | 7.41E-03 | 0.0725 | hsa-mir-10a,hsa-mir-125a,hsa-mir-99a |
| Psoriasis | 6 | 7.65E-03 | 0.0735 | hsa-let-7a-2,hsa-let-7a-3,hsa-mir-146b,hsa-mir-99a,hsa-let-7a-1,hsa-mir-150 |
| Acute Myocardial Infarction(UP) | 5 | 8.27E-03 | 0.0787 | hsa-mir-122,hsa-mir-328,hsa-mir-150,hsa-mir-486-2,hsa-mir-486-1 |
| Sepsis | 6 | 8.89E-03 | 0.0789 | hsa-mir-486-2,hsa-mir-342,hsa-mir-486-1,hsa-mir-122,hsa-mir-375,hsa-mir-150 |
| Systemic Lupus Erythematosus | 8 | 8.49E-03 | 0.0801 | hsa-mir-342,hsa-mir-148a,hsa-let-7e,hsa-let-7d,hsa-mir-10a,hsa-mir-629,hsa-mir-328,hsa-mir-150 |
| Pancreas Development | 2 | 8.73E-03 | 0.0816 | hsa-let-7e,hsa-mir-375 |
| Ischemia-Reperfusion Injury(DOWN) | 2 | 8.73E-03 | 0.0816 | hsa-mir-92a-2,hsa-mir-92a-1 |
| Lung Injury [unspecific](DOWN) | 2 | 8.73E-03 | 0.0816 | hsa-mir-92a-1,hsa-mir-92a-2 |
| Vascular Injuries(UP) | 2 | 8.73E-03 | 0.0816 | hsa-mir-92a-2,hsa-mir-92a-1 |
| hsa-let-7a-1 cluster | 2 | 8.73E-03 | 0.0816 | hsa-let-7a-1,hsa-let-7d |
| hsa-mir-99b cluster | 2 | 8.73E-03 | 0.0816 | hsa-let-7e,hsa-mir-125a |
| Diabetes Mellitus, Type 2(DOWN) | 8 | 9.48E-03 | 0.0834 | hsa-let-7a-1,hsa-let-7d,hsa-mir-150,hsa-mir-146b,hsa-let-7a-3,hsa-mir-92a-1,hsa-let-7a-2,hsa-mir-92a-2 |
| Coronary Heart Diseases(UP) | 5 | 9.90E-03 | 0.0864 | hsa-mir-122,hsa-mir-486-2,hsa-mir-92a-1,hsa-mir-486-1,hsa-mir-92a-2 |
| Osteoporosis | 3 | 0.0107 | 0.0924 | hsa-mir-148a,hsa-mir-150,hsa-let-7g |
| Squamous Cell Carcinoma, Esophageal(UP) | 7 | 0.0108 | 0.093 | hsa-mir-25,hsa-mir-375,hsa-let-7e,hsa-mir-183,hsa-mir-125a,hsa-mir-1290,hsa-mir-192 |
| Adenovirus Infection | 6 | 0.0118 | 0.1005 | hsa-mir-148a,hsa-mir-26b,hsa-mir-146b,hsa-mir-378a,hsa-mir-122,hsa-mir-150 |
| Adenocarcinoma, Lung(UP) | 5 | 0.0138 | 0.1167 | hsa-mir-25,hsa-mir-328,hsa-mir-150,hsa-mir-183,hsa-mir-342 |
| Osteosarcoma(UP) | 8 | 0.0143 | 0.1199 | hsa-mir-664a,hsa-let-7a-1,hsa-mir-543,hsa-mir-146b,hsa-mir-148a,hsa-mir-92a-1,hsa-let-7a-2,hsa-mir-92a-2 |
| Alcoholic Hepatitis | 3 | 0.0147 | 0.12 | hsa-mir-1246,hsa-mir-192,hsa-mir-122 |
| Epstein-Barr Virus Infection | 4 | 0.0145 | 0.1204 | hsa-mir-183,hsa-let-7a-2,hsa-let-7a-1,hsa-mir-10a |
| Obesity(UP) | 4 | 0.0145 | 0.1204 | hsa-mir-122,hsa-mir-125a,hsa-mir-148a,hsa-mir-378a |
| Peritoneal Dialysis Failure(UP) | 5 | 0.0161 | 0.1308 | hsa-mir-26b,hsa-let-7d,hsa-mir-146b,hsa-mir-148a,hsa-mir-192 |
| Carcinoma, Lung(DOWN) | 11 | 0.0171 | 0.1309 | hsa-let-7a-2,hsa-mir-486-1,hsa-mir-370,hsa-let-7a-1,hsa-mir-99a,hsa-mir-486-2,hsa-mir-148a,hsa-let-7a-3,hsa-mir-92a-1,hsa-mir-92a-2,hsa-mir-125a |
| Atrial Fibrillation(UP) | 6 | 0.0174 | 0.1318 | hsa-mir-25,hsa-mir-328,hsa-mir-486-2,hsa-mir-146b,hsa-mir-10a,hsa-mir-486-1 |
| Hyperactivity Disorder | 2 | 0.0168 | 0.1357 | hsa-let-7d,hsa-mir-183 |
| Crohn Disease(UP) | 2 | 0.0168 | 0.1357 | hsa-let-7e,hsa-let-7d |
| Carcinoma, Lung, Small-Cell(UP) | 2 | 0.0168 | 0.1357 | hsa-mir-92a-2,hsa-mir-125a |
| Leukemia, Myeloid, Acute, Pediatric(UP) | 2 | 0.0168 | 0.1357 | hsa-mir-183,hsa-mir-375 |
| Vasculitis(DOWN) | 2 | 0.0168 | 0.1357 | hsa-mir-92a-1,hsa-mir-92a-2 |
| HNF1A | 2 | 0.0168 | 0.1357 | hsa-mir-192,hsa-mir-122 |
| hsa-mir-3619 cluster | 2 | 0.0168 | 0.1357 | hsa-let-7a-3,hsa-let-7b |
| Polycystic Ovarian Syndrome | 5 | 0.0187 | 0.1406 | hsa-mir-486-2,hsa-mir-486-1,hsa-mir-25,hsa-mir-122,hsa-mir-375 |
| Obesity | 7 | 0.0188 | 0.1408 | hsa-mir-125a,hsa-mir-342,hsa-mir-148a,hsa-mir-26b,hsa-mir-146b,hsa-mir-378a,hsa-mir-122 |
| Carcinoma, Cervical(UP) | 8 | 0.019 | 0.141 | hsa-mir-25,hsa-mir-543,hsa-mir-361,hsa-mir-150,hsa-mir-375,hsa-mir-10a,hsa-mir-92a-1,hsa-mir-92a-2 |
| Cutaneous Melanoma(UP) | 3 | 0.0194 | 0.1429 | hsa-let-7a-2,hsa-let-7a-1,hsa-let-7a-3 |
| Alcoholic Hepatitis(UP) | 3 | 0.0194 | 0.1429 | hsa-mir-122,hsa-mir-192,hsa-mir-1246 |
| Carcinoma, Ovarian, Serous(UP) | 3 | 0.0194 | 0.1429 | hsa-mir-92a-1,hsa-mir-92a-2,hsa-mir-1246 |
| Neuropsychiatric Disorders [unspecific](DOWN) | 3 | 0.0194 | 0.1429 | hsa-mir-1290,hsa-mir-146b,hsa-mir-296 |
| CEBPA | 3 | 0.0194 | 0.1429 | hsa-let-7a-2,hsa-let-7a-1,hsa-let-7a-3 |
| SPI1 | 3 | 0.0194 | 0.1429 | hsa-mir-342,hsa-mir-92a-1,hsa-mir-92a-2 |
| hsa-mir-2392 cluster | 3 | 0.0194 | 0.1429 | hsa-mir-433,hsa-mir-432,hsa-mir-370 |
| Polycythemia Vera | 4 | 0.0211 | 0.1483 | hsa-mir-125a,hsa-mir-150,hsa-mir-26b,hsa-mir-378a |
| Squamous Cell Carcinoma, Esophageal(DOWN) | 9 | 0.0233 | 0.1629 | hsa-mir-26b,hsa-let-7a-1,hsa-let-7g,hsa-let-7b,hsa-let-7d,hsa-mir-150,hsa-let-7e,hsa-let-7a-3,hsa-let-7a-2 |
| Peritoneal Dialysis Failure | 5 | 0.0245 | 0.17 | hsa-mir-148a,hsa-mir-26b,hsa-let-7d,hsa-mir-146b,hsa-mir-192 |
| Ewing's Sarcoma(DOWN) | 3 | 0.0248 | 0.1711 | hsa-let-7a-2,hsa-let-7a-1,hsa-let-7a-3 |
| Carcinoma, Hepatocellular(UP) | 14 | 0.0253 | 0.1728 | hsa-mir-122,hsa-mir-146b,hsa-mir-183,hsa-let-7a-2,hsa-mir-25,hsa-mir-432,hsa-let-7e,hsa-mir-10a,hsa-let-7a-1,hsa-mir-148a,hsa-mir-92a-1,hsa-mir-92a-2,hsa-mir-1246,hsa-mir-125a |
| Apoptosis | 11 | 0.0258 | 0.1752 | hsa-mir-92a-1,hsa-mir-1246,hsa-mir-10a,hsa-mir-122,hsa-mir-92a-2,hsa-mir-150,hsa-let-7g,hsa-mir-125a,hsa-mir-26b,hsa-mir-370,hsa-mir-148a |
| Chronic Kidney Disease | 5 | 0.0278 | 0.1778 | hsa-let-7a-2,hsa-mir-26b,hsa-let-7a-3,hsa-let-7a-1,hsa-mir-150 |
| Hepatitis B Virus Infection | 8 | 0.0268 | 0.1811 | hsa-mir-125a,hsa-let-7a-2,hsa-mir-26b,hsa-let-7a-3,hsa-mir-370,hsa-mir-122,hsa-mir-99a,hsa-let-7a-1 |
| Hepatic Stellate Cell Differentiation | 2 | 0.0271 | 0.1817 | hsa-let-7b,hsa-mir-122 |
| Megakaryocyte Differentiation | 2 | 0.0271 | 0.1817 | hsa-mir-146b,hsa-mir-10a |
| Varicella | 2 | 0.0271 | 0.1817 | hsa-mir-629,hsa-mir-122 |
| Acquired Immunodeficiency Syndrome | 2 | 0.0271 | 0.1817 | hsa-mir-150,hsa-mir-146b |
| Atopic Dermatitis(UP) | 2 | 0.0271 | 0.1817 | hsa-mir-148a,hsa-let-7b |
| Varicella(UP) | 2 | 0.0271 | 0.1817 | hsa-mir-122,hsa-mir-629 |
| Aplastic Anemia(UP) | 2 | 0.0271 | 0.1817 | hsa-mir-146b,hsa-mir-150 |
| mir-1273 family | 2 | 0.0271 | 0.1817 | hsa-mir-1273d,hsa-mir-1273f |
| Cardiac Regeneration | 4 | 0.0293 | 0.1861 | hsa-let-7a-2,hsa-let-7a-3,hsa-mir-99a,hsa-let-7a-1 |
| Lung Fibrosis | 4 | 0.0293 | 0.1861 | hsa-mir-486-2,hsa-mir-26b,hsa-mir-486-1,hsa-let-7d |
| Coronary Heart Diseases | 7 | 0.0303 | 0.19 | hsa-mir-486-2,hsa-mir-92a-1,hsa-mir-486-1,hsa-mir-361,hsa-mir-122,hsa-mir-939,hsa-mir-92a-2 |
| Carcinoma, Ovarian(UP) | 8 | 0.0315 | 0.1927 | hsa-mir-433,hsa-let-7a-1,hsa-mir-25,hsa-mir-939,hsa-mir-378a,hsa-mir-1307,hsa-let-7a-3,hsa-let-7a-2 |
| Spinal Cord Injuries | 3 | 0.031 | 0.1934 | hsa-let-7a-2,hsa-let-7a-1,hsa-let-7a-3 |
| Lupus Nephritis | 3 | 0.031 | 0.1934 | hsa-mir-125a,hsa-mir-148a,hsa-mir-150 |
| Cholangiocarcinoma(DOWN) | 3 | 0.031 | 0.1934 | hsa-mir-122,hsa-mir-26b,hsa-mir-150 |
| Carcinoma, Ovarian(DOWN) | 10 | 0.0327 | 0.1989 | hsa-mir-122,hsa-mir-150,hsa-mir-370,hsa-mir-432,hsa-let-7e,hsa-mir-543,hsa-mir-26b,hsa-mir-99a,hsa-mir-148a,hsa-mir-485 |
| Cell Cycle | 9 | 0.0337 | 0.2041 | hsa-let-7a-2,hsa-let-7b,hsa-mir-92a-1,hsa-let-7a-3,hsa-mir-122,hsa-let-7a-1,hsa-mir-150,hsa-mir-92a-2,hsa-let-7g |
| Ischemia-Reperfusion Injury | 4 | 0.0341 | 0.205 | hsa-mir-92a-1,hsa-mir-122,hsa-mir-92a-2,hsa-mir-192 |
| Preeclampsia(UP) | 4 | 0.0392 | 0.2196 | hsa-mir-26b,hsa-mir-296,hsa-mir-25,hsa-mir-342 |
| Neuron Differentiation | 3 | 0.038 | 0.2272 | hsa-mir-183,hsa-mir-1290,hsa-mir-1246 |
| Coronary Atherosclerosis | 3 | 0.038 | 0.2272 | hsa-mir-125a,hsa-mir-1273d,hsa-mir-1273f |
| Retinoblastoma(DOWN) | 3 | 0.038 | 0.2272 | hsa-mir-125a,hsa-mir-433,hsa-mir-183 |
| Squamous Cell Carcinoma, Laryngeal or Hypopharyngeal(DOWN) | 3 | 0.038 | 0.2272 | hsa-mir-375,hsa-mir-370,hsa-mir-148a |
| Endothelial Cell Proliferation | 2 | 0.0392 | 0.2292 | hsa-mir-125a,hsa-mir-433 |
| Digeorge Syndrome | 2 | 0.0392 | 0.2292 | hsa-mir-125a,hsa-mir-150 |
| Irritable Bowel Syndrome | 2 | 0.0392 | 0.2292 | hsa-mir-342,hsa-mir-150 |
| Coronary Atherosclerosis(UP) | 2 | 0.0392 | 0.2292 | hsa-mir-1273d,hsa-mir-1273f |
| Sepsis(DOWN) | 2 | 0.0392 | 0.2292 | hsa-mir-150,hsa-mir-375 |
| Pancreatic Intraductal Papillary Mucinous Neoplasms(DOWN) | 2 | 0.0392 | 0.2292 | hsa-mir-99a,hsa-mir-342 |
| Idiopathic Pulmonary Fibrosis(DOWN) | 2 | 0.0392 | 0.2292 | hsa-mir-92a-2,hsa-mir-92a-1 |
| Adrenal | 2 | 0.0392 | 0.2292 | hsa-mir-485,hsa-mir-370 |
| Alzheimer's Disease | 10 | 0.042 | 0.2339 | hsa-let-7d,hsa-mir-375,hsa-mir-296,hsa-let-7a-2,hsa-let-7a-3,hsa-mir-10a,hsa-let-7g,hsa-mir-26b,hsa-mir-342,hsa-let-7a-1 |
| Chronic Hepatitis C | 5 | 0.044 | 0.2437 | hsa-let-7a-2,hsa-mir-122,hsa-mir-296,hsa-mir-99a,hsa-let-7a-1 |
| Cholesterol Efflux | 3 | 0.0456 | 0.2515 | hsa-mir-486-2,hsa-mir-486-1,hsa-mir-378a |
| Maternal Obesity During Childbirth | 3 | 0.0456 | 0.2515 | hsa-mir-375,hsa-mir-150,hsa-mir-122 |
| Squamous Cell Carcinoma, Tongue(DOWN) | 3 | 0.0456 | 0.2515 | hsa-mir-26b,hsa-mir-375,hsa-mir-25 |

Table S4. The differentially expressed miRNAs in serum of patients compared with controls.

| **miRNA** | **DEmiR** | **Expression** | | | |
| --- | --- | --- | --- | --- | --- |
| **Men** | | **Women** | |
| **fold-change** | **P-value** | **fold-change** | **P-value** |
| hsa-miR-5096 | Men_DEmiR | -4.6325 | 0.0018 | -2.0799 | 0.1363 |
| hsa-miR-432-5p | Women_DEmiR | 2.2483 | 0.1512 | 4.8007 | 0.0056 |
| hsa-miR-486-5p | Women_DEmiR | 1.4969 | 0.3119 | 3.0152 | 0.0057 |
| hsa-miR-1273d | Both_DEmiR | -7.0657 | 0.0000 | -2.5374 | 0.0490 |
| hsa-miR-1273f | Men_DEmiR | -4.0282 | 0.0048 | -2.2161 | 0.1076 |
| hsa-miR-125a-3p | Women_DEmiR | 1.7015 | 0.2825 | 3.4059 | 0.0146 |
| hsa-miR-4792 | Men_DEmiR | -5.9685 | 0.0016 | 1.1089 | 0.8582 |
| hsa-miR-370-3p | Women_DEmiR | -1.8325 | 0.1685 | -2.7313 | 0.0224 |
| hsa-miR-550b-2-5p | Both_DEmiR | -3.4912 | 0.0291 | -5.7711 | 0.0024 |
| hsa-miR-433-3p | Women_DEmiR | 2.1358 | 0.2093 | 4.3963 | 0.0144 |
| hsa-miR-122-5p | Men_DEmiR | 3.0427 | 0.0342 | 1.2570 | 0.6634 |
| hsa-miR-342-3p | Women_DEmiR | -1.1698 | 0.7919 | 3.4421 | 0.0382 |
| hsa-miR-939-5p | Men_DEmiR | -3.0852 | 0.0132 | 1.1781 | 0.7171 |
| hsa-miR-485-5p | Women_DEmiR | 1.3049 | 0.6578 | 3.2773 | 0.0484 |
| hsa-miR-543 | Women_DEmiR | 1.0317 | 0.9576 | 3.4329 | 0.0358 |
| hsa-miR-4661-5p | Men_DEmiR | -4.1847 | 0.0214 | -1.2414 | 0.7281 |
| hsa-let-7e-5p | Women_DEmiR | 1.5831 | 0.3866 | 3.2048 | 0.0302 |
| hsa-let-7d-5p | Women_DEmiR | 1.2872 | 0.6529 | 3.0777 | 0.0455 |
| hsa-miR-183-5p | Women_DEmiR | -1.1447 | 0.8243 | 5.0183 | 0.0086 |
| hsa-miR-1285-5p | Men_DEmiR | -4.8428 | 0.0068 | -1.1923 | 0.7620 |
| hsa-miR-3180 | Men_DEmiR | -2.8445 | 0.0360 | 1.3159 | 0.5815 |
| hsa-miR-92a-3p | Women_DEmiR | 1.5675 | 0.3965 | 4.5921 | 0.0040 |
| hsa-miR-664a-5p | Women_DEmiR | 1.8168 | 0.3284 | 3.7901 | 0.0295 |
| hsa-miR-642a-3p | Both_DEmiR | -5.1092 | 0.0017 | -4.0151 | 0.0073 |
| hsa-miR-1246 | Women_DEmiR | 1.9749 | 0.1802 | 4.3938 | 0.0037 |
| hsa-miR-328-3p | Women_DEmiR | 1.1393 | 0.7722 | 3.0396 | 0.0138 |
| hsa-miR-3180-3p | Men_DEmiR | -2.8445 | 0.0360 | 1.3159 | 0.5815 |
| hsa-miR-1268b | Women_DEmiR | -1.1118 | 0.8593 | -3.2751 | 0.0477 |
| hsa-miR-99a-5p | Women_DEmiR | 2.0067 | 0.1459 | 2.6359 | 0.0431 |
| hsa-miR-378a-5p | Women_DEmiR | 1.5255 | 0.4774 | -3.9005 | 0.0220 |
| hsa-miR-296-3p | Men_DEmiR | 3.6861 | 0.0349 | -1.0379 | 0.9518 |
| hsa-miR-1268a | Women_DEmiR | 1.0468 | 0.9366 | -3.3945 | 0.0339 |
| hsa-miR-1273h-3p | Both_DEmiR | -2.8207 | 0.0181 | -2.4566 | 0.0405 |
| hsa-miR-4433b-3p | Men_DEmiR | -3.3162 | 0.0133 | 1.1598 | 0.7595 |
| hsa-miR-659-5p | Men_DEmiR | -3.5506 | 0.0259 | -2.5429 | 0.1000 |
| hsa-miR-3656 | Both_DEmiR | -3.2367 | 0.0168 | -3.2369 | 0.0166 |
| hsa-miR-2115-5p | Men_DEmiR | -4.3138 | 0.0182 | -2.2471 | 0.1914 |
| hsa-miR-629-3p | Men_DEmiR | -5.9731 | 0.0042 | -2.0888 | 0.2378 |
| hsa-miR-146b-5p | Women_DEmiR | 1.1397 | 0.8254 | 3.6444 | 0.0294 |
| hsa-miR-3158-3p | Men_DEmiR | -2.2825 | 0.0422 | 1.7703 | 0.1599 |
| hsa-miR-10a-5p | Women_DEmiR | 1.3343 | 0.6031 | 11.0638 | 0.0000 |
| hsa-let-7b-5p | Women_DEmiR | 1.5537 | 0.2838 | 2.8379 | 0.0112 |
| hsa-miR-3614-5p | Women_DEmiR | -2.4462 | 0.1254 | -3.7569 | 0.0227 |
| hsa-miR-192-5p | Women_DEmiR | 1.0695 | 0.8981 | 3.0245 | 0.0354 |
| hsa-miR-1183 | Both_DEmiR | -3.4380 | 0.0276 | -4.9916 | 0.0040 |
| hsa-miR-4448 | Men_DEmiR | -3.0375 | 0.0434 | -2.1217 | 0.1818 |
| hsa-miR-1290 | Women_DEmiR | 2.3286 | 0.1164 | 3.6969 | 0.0169 |
| hsa-miR-375 | Women_DEmiR | 1.5046 | 0.3615 | 2.5052 | 0.0412 |
| hsa-miR-150-5p | Women_DEmiR | 2.0353 | 0.2336 | 3.3589 | 0.0431 |
| hsa-let-7g-5p | Women_DEmiR | 1.5372 | 0.3915 | 3.4335 | 0.0145 |
| hsa-miR-619-5p | Both_DEmiR | -3.5778 | 0.0077 | -2.5841 | 0.0470 |
| hsa-miR-26b-5p | Men_DEmiR | -3.4410 | 0.0351 | 1.8306 | 0.3047 |
| hsa-miR-361-3p | Women_DEmiR | 1.0857 | 0.8561 | 2.6234 | 0.0336 |
| hsa-miR-25-3p | Women_DEmiR | 1.4523 | 0.3869 | 2.6040 | 0.0266 |
| hsa-miR-148a-3p | Women_DEmiR | 1.6518 | 0.3204 | 2.7011 | 0.0491 |
| hsa-miR-5010-5p | Women_DEmiR | 1.8837 | 0.2628 | 4.9766 | 0.0049 |
| hsa-miR-1307-5p | Women_DEmiR | 1.5276 | 0.4068 | -3.2522 | 0.0183 |
| hsa-let-7a-5p | Women_DEmiR | 2.1536 | 0.0688 | 3.1470 | 0.0066 |
| hsa-miR-7110-5p | Women_DEmiR | -1.9414 | 0.2877 | -4.7027 | 0.0130 |

Men_DEmiR and Women_DEmiR indicate the differentially expressed miRNAs in men and women. Abbreviations: DEmiR, differentially expressed microRNAs

Table S5. Differentially expressed target genes for six miRNAs

| miR | target gene (Up) | target gene (Down) |
| --- | --- | --- |
| let-7a-5p | RGMA|TRANK1|ZC3H3|MYO1F|ELF4|AGO1|C15orf39|PAK1|ZNF341|WIPI2|ARID3A|DVL3|STK40|GNS|TNFRSF1B|MSN|WDFY4|GPR137|PLXNA4|GAB2|SEC14L1|NCOA1|CHD4|UGGT1|TRIOBP|STAT3|BBX|GNG5|ZNF473|SLC5A6|RBPJ|USP32|TRIM41|RRAGD|CLOCK|PTAFR|CCNJL|TTLL4|EFHD2|PLAGL2|USP49|FAM222B | FOPNL|ARL5A|ZNF322|LEPROTL1|MED28|GLRX|MOB4|LUC7L3|IPO11|EDEM3|MAPK8|RAB8B|SUCLG2|CHD9|TMED5|GXYLT1|BTF3L4|ICOS|CNTRL|UFM1|CASP3|GOLGA7|STYX|RASGRP1|RNF7|FRS2|GRPEL2|ZNF451|YTHDF3|KLF9|XRN1|ATPAF1|PBX3|VCPIP1|KPNA4|APPBP2|COIL|ATG16L1|DNAJA2|PGRMC1|CRBN|NAA20|PIGA|PGM2L1|ZNF644 |
| miR-296-3p | DVL3|FAM129A | TMED7|TBC1D15|SHOC2|SERBP1 |
| miR-619-5p | USB1|LILRA6|GATAD2A|DYSF|MYO1F|TLN1|AGO1|C15orf39|ZNFX1|LRP10|EPN1|RASGRP4|PIAS1|GBA|LGALS9B|ATP6V0D1|N4BP1|KDM2A|MARK2|LYN|YME1L1|MNT|TRIM8|SNX22|FIG4|RARA|MET|SEC63|RRAGC|GPSM3|ITGAX|SPC24|PRKD2|CREBBP|IL18|FAM63A|PPM1K|MOB3A|NUCB1|ITGAL|ABHD2|ZNF785|BCL3|HELZ2|ATG7|DVL3|MAST3|CRISPLD2|SLC16A3|MIDN|CDK12|SLC9A8|RAD54L2|TBL1X|STK40|GNS|MCM8|TNFRSF1B|ANPEP|NFIC|GMIP|CCDC97|TOLLIP|PLXDC2|SP2|VPS13C|PIP5K1C|MSN|LTB4R|XPO6|ETV6|SCAMP2|NCF1|RALY|C5AR1|RNF24|DEDD2|LASP1|C1RL|SLX4IP|FPR1|STK10|SLC2A3|KIAA1324|FGF23|PLXNA4|PRICKLE2|FAM129A|SETD1B|ZYX|AKR1D1|GAB2|RPS6KA1|NCOA1|MX2|IGF2R|CDC42EP4|ALDH3B1|ARCN1|ITPRIP|EXTL3|INTS3|UGGT1|TRIM38|TRIOBP|GNB2|SEMA4D|STAT3|SP1|RERE|GSK3B|ZNF577|C17orf62|BRD3|COQ10A|IL17RA|G6PD|FFAR2|BBX|KMT2B|CHP1|APMAP|PLP1|CYTH4|TRIM21|C10orf76|PLCG2|PPP1R10|C7orf26|PTGR2|GRB2|NBPF10|RBM23|MTF1|IDH3G|HNRNPUL1|NFKBIB|PSTPIP1|MGRN1|WASF2|SPN|ADORA1|PML|TM7SF3|MAP7D1|ACTR1A|PLAA|GBP2|NCF4|TRIM25|FKTN|DCP1A|ZNF473|C21orf58|KDELR1|NUBPL|RNF19B|ZFYVE1|LMOD3|THOC5|ZNF213|PFKFB4|CTSD|CDAN1|USP32|RBM41|ELMO2|RAD51D|NEK6|NEO1|CCR5|RRAGD|R3HDM4|IP6K1|PLIN3|GNL3L|SGSM3|RABGAP1|FBXW7|TREML2|RHOA|RAB5B|FAM219A|PTAFR|SSH2|ZNF264|TMC6|LPIN2|SARS|PLIN5|PAPSS2|NCEH1|NFAT5|ZMIZ2|GLG1|PSMD1|TANGO2|ZNF398|OSBPL7|C8orf37|PDXK|TTLL4|NDST1|PLEKHO2|SELPLG|SLC25A37|USP49|PTDSS2|FKBP14|LRG1|EIF2AK2|BCORL1 | HSPA14|HIST1H4C|CLNS1A|COX20|ZNF529|TP53RK|COA5|DCUN1D5|RPL9|ZNF26|GPR183|MTMR9|OMA1|CCDC14|DBT|RPL13|TRAF5|CAPZA2|RPS9|RPL13A|ZNF322|LEPROTL1|MED28|PQLC3|SRSF7|MOB4|COPS8|DESI2|SP4|LANCL1|MAT2B|PPWD1|TMEM216|ZNHIT3|UBE2N|REEP5|LAMTOR3|RPS15A|CD47|NIP7|SDCCAG3|TPT1|RPL27A|WDR75|PPP1CB|SCO1|SF3B1|TRA2B|ZNF816|ATP6V0A2|EDEM3|NCK1|ZMYND11|SETDB2|CBFB|MTO1|USP1|AK3|COA1|ARL4C|C4orf3|DDX50|ATG14|SMIM19|ATM|SUCLG2|UHMK1|RCOR3|C12orf65|FAM175B|BNIP3|PPP1CC|GLUD1|DDX21|CDC40|UBA6|RWDD1|PFDN1|NAA38|COQ5|ARL8B|TFRC|RAB10|MTRR|RPL24|LYRM2|GXYLT1|TMED7|BTF3L4|GEMIN6|NUP37|AZIN1|TSNAX|ZZZ3|ICOS|MEMO1|ANAPC16|ADO|WDFY1|ZFP90|SMAD4|RBM25|SRD5A1|TMCO1|TMEM218|SLC30A9|CD3D|TBC1D15|TMEM59|PLGRKT|MRPL11|API5|ZNF277|07-Mar|GOLGA7|ITK|RASGRP1|POLR3F|ZNF613|TOMM20|OGT|NCOA7|GRPEL2|RPL23|PRRC1|SRSF1|NMT2|YTHDF3|EIF3H|ARMC10|SCAMP1|DYRK4|XRN1|SLC38A2|CDC42SE2|ATPAF1|PRKCI|USP15|MRPL3|SERBP1|ITCH|PTGER2|ANKRD12|ATAD1|ZNF248|IRAK4|HDAC2|STRAP|ANKLE2|TMEM245|ROMO1|LRR1|SRSF3|CD28|TRAT1|ABHD6|KRAS|TOMM7|SP3|OCIAD1|MRGBP|CRIPT|ATG16L1|PRKAR1A|COQ10B|RPS27A|MRPS30|TBK1|RABEP1|KLHL3|NAA20|RAB21|GIMAP1|GHITM|CYB5B|CKS1B|ZFP3|FAM172A|VPS4B|POC1B|OCIAD2|PROSC|PGM2L1|SEC22A|RPL22|DOCK11|VPS37A|CA5B|RPA3|GRSF1|SNRNP27|RSL1D1|TTC19|GLTP|NUPL2|PMPCB|SGPL1|STAMBPL1|AP5M1 |
| miR-642-3p | LILRA6|GATAD2A|CNOT4|MYO1F|AGO1|BASP1|PIAS1|ATP6V0D1|KDM2A|PAK1|ELMO1|LITAF|SORL1|MNT|SYK|MET|NADK|RRAGC|PRKD2|WIPI2|PPM1K|NUCB1|ITGAL|ABHD2|TRIM26|VPS37B|MAST3|KIAA0430|TLE3|CRISPLD2|ACAD10|SLC16A3|SEC24C|B4GALT5|RAD54L2|TBL1X|STK40|GNS|MCM8|UBN1|ANPEP|CMIP|TIMP2|RRBP1|TOLLIP|PLXDC2|PIP5K1C|WDFY4|ETV6|KAT6A|SCAMP2|RXRA|C1RL|RBCK1|SLX4IP|FAM129A|SETD1B|MAP3K5|FAM193A|NCOA1|IGF2R|MAPK3|ARCN1|ITPRIP|EXTL3|GORASP1|UGGT1|TRIOBP|SEMA4D|OSBPL2|STAT3|GSK3B|PI4KB|IL17RA|BBX|CHP1|C7orf26|TNS3|MTF1|MGRN1|TM7SF3|SAP130|HK1|RNF19B|CAPNS1|COPRS|DNAJC5|KIAA0368|RBM41|RAD51D|ZDHHC7|RRAGD|IP6K1|GNL3L|CLOCK|RABGAP1|TREML2|RAB5B|PTAFR|CABIN1|SSH2|PLIN5|CKAP4|DDX58|PAPSS2|NFAT5|C8orf37|PDXK|EFHD2|NDST1|PLEKHO2|PLAGL2|NCF2|USP49|PHF21A|ANTXR2|EIF2AK2|BCORL1 | RPS3|RPS14|CLNS1A|NDUFB5|ZNF529|PSMD10|TP53RK|CAMLG|ATP6V1G1|MED4|NDUFA4|GSKIP|MKKS|DCUN1D5|PDCD10|CRLS1|ZBTB33|VPS36|DBT|RPS9|ARL5A|VPS29|PSMG4|RPL4|ZNF22|AKAP11|GLRX|CEP44|SRSF7|GMFB|RBX1|COPS8|LUC7L3|UQCRQ|ANKRD49|MAT2B|ARL2BP|UBE2N|REEP5|DUT|BRWD1|FOXN2|UNC50|THUMPD1|FBXO33|CD47|RAB11A|NDUFAB1|MTF2|ANXA1|TRAM1|CCDC90B|SCO1|IL6ST|CHMP5|RHEB|TRA2B|ZNF816|DDX3X|VMA21|SLC25A46|ATP6V0A2|NCK1|TMEM181|IRF2BP2|RPS17|SACM1L|AK3|MAPK8|DDX50|ATM|HOPX|RPS6|C5orf15|SUCLG2|UHMK1|SNRPF|CHD9|PPP1CC|LEMD3|RCN2|RWDD1|NAA38|TFRC|TRAPPC11|RAB10|LYRM2|BTF3L4|GEMIN6|NUP37|TFAM|ZZZ3|ICOS|MEMO1|HSF2|CNIH1|SUN1|VAMP7|TMCO1|CD3D|ACBD3|SNRK|DFFB|FEM1C|RALA|POLR3F|CWC15|NCOA7|LSM7|GRPEL2|SLMAP|ZNF451|PRRC1|STARD7|SRSF1|NMT2|PJA2|YTHDF3|SCAMP1|TXNDC17|LPIN1|XRN1|SLC38A2|CDC42SE2|ATPAF1|MRPL3|SERBP1|ITCH|TYW1B|ATAD1|HADH|STRAP|BNIP2|BEX4|TMEM245|FAM107B|CDKN1B|MLH1|ETFA|USO1|RHOT1|SRSF3|CD28|KRAS|SKA2|PTGS2|SP3|APPBP2|COIL|MRGBP|BTLA|CRIPT|ATG16L1|DNAJA2|GLRX3|ST13|C6orf62|PRKAR1A|COQ10B|MED10|DNAJC15|PGRMC1|ORAOV1|ELF2|RABEP1|SEL1L3|KLHL3|CAB39|RAB21|GHITM|DDX18|ZFP3|BCDIN3D|PROSC|RNGTT|COPS4|PGM2L1|CA5B|HNRNPA0|GRSF1|CDC14A|C9orf72|CUL2|CHD1|NUPL2|AP4E1|HNRNPDL|PMPCB|SGPL1|PTPMT1|SFT2D1|STAMBPL1|AP5M1 |
| miR-1273d | ELF4|AGO1|RENBP|SORT1|MARK2|ELMO1|YME1L1|SORL1|SNX22|NADK|PPM1K|LAMP1|ARID3A|KIAA0430|B4GALT5|RAD54L2|STK40|GNS|TIMP2|RNF24|LASP1|SLC2A3|KIAA1324|FGF23|FAM129A|CXCR1|NCOA1|TRIM38|PADI2|GSK3B|FFAR2|PLP1|OTUD5|PLCG2|PPP1R10|WASF2|PML|TRIM25|FKTN|KDELR1|ODF2|RBM41|NEO1|ZDHHC7|CCR5|RRAGD|IP6K1|GNL3L|PTAFR|ACOT11|ZNF264|SARS|DIAPH1|SLC19A1|NFAT5|GLG1|SELPLG|SLC25A37|PTDSS2|PHF21A | NDUFB5|PSMD10|COA5|GSKIP|DCUN1D5|CRLS1|DBT|FAM96A|ARL5A|FAM60A|LEPROTL1|RPL15|FBXO8|GOLGA8B|MED28|RSBN1|GMFB|LUC7L3|COMMD6|DESI2|FAM69A|LANCL1|UBE2Q2|TMED2|AIDA|BRK1|PURA|ARL2BP|UBE2N|DUT|BRWD1|TOMM6|SET|RAB11A|MTF2|WDR75|EEF1A1|SCO1|STMN1|SF3B1|RPS6KB1|CHMP5|RHEB|TRA2B|SLC25A46|MTO1|IRF2BP2|RPS17|ARL4C|UBE2E1|ATG14|SMIM19|RGS18|ATM|C5orf15|UHMK1|SNRPF|FAM175B|CHD9|DDX21|TMEM170B|RWDD1|NAA38|ARL8B|TFRC|C18orf25|RAB10|GXYLT1|BTF3L4|GEMIN6|AZIN1|TFAM|PIGF|ADO|ZFP90|CNIH1|SUN1|RBM25|TMCO1|EXOSC3|SLC30A9|ACBD3|NIF3L1|MBNL1|PLGRKT|COX4I1|FEM1C|RNF7|CALM2|DERL1|ZNF613|TOMM20|GRPEL2|PRRC1|STARD7|SRSF1|NMT2|SCAMP1|USP15|GTF3C3|SERBP1|PTGER2|ATAD1|IRAK4|HDAC2|TMEM245|GNAI3|LRR1|CD28|SRSF6|TRAT1|SRP72|RPL7|KRAS|VCPIP1|SP3|BTLA|CRIPT|ATG16L1|DNAJA2|GLRX3|ZBTB14|RABEP1|KLHL3|RPS28|RAB21|CYB5B|RAN|DDX18|ZFP3|FAM172A|PIGA|BCDIN3D|POC1B|MAT2A|VPS37A|CA5B|GRSF1|CHORDC1|RSL1D1|ZC3HC1|KIFAP3|STAMBPL1|AP5M1|TMED10 |
| miR-4433b-3p | USB1|ACTN1|MYO1F|TLN1|AGO1|EIF4G3|RIPK1|BASP1|LRP10|EPN1|GPR108|GBA|KDM2A|MARK2|PAK1|SERTAD1|ARHGAP1|SORL1|SEMA4A|ARF3|MET|ALPL|CREBBP|FAM63A|MOB3A|ABHD2|KCTD2|TLE3|CRISPLD2|MIDN|CECR1|GNS|GATAD2B|MCM8|TNFRSF1B|NFIC|CMIP|CCDC97|PLXDC2|SP2|LPCAT3|VPS13C|PIP5K1C|MSN|LTB4R|XPO6|AP2A2|ETV6|KAT6A|GPR137|RNF24|POLR2A|RBCK1|STK10|PLXNA4|IGF2R|CDC42EP4|ARCN1|SLC9A1|SCARB1|LAPTM5|DNM2|SLC26A8|TRIM38|AGFG1|SP1|AXIN1|ZNF577|LCP1|G6PD|ACOX3|GNG5|PLCB2|HOXD3|CHST15|RBM23|IDH3G|PSTPIP1|MGRN1|WASF2|FBRSL1|KIAA2013|PML|ACTR1A|GBP2|FKTN|ZNF473|C21orf58|KDELR1|RNF19B|CAPNS1|SF3B2|SLC22A18|RBM41|RRAGD|IP6K1|PLIN3|GNL3L|RABGAP1|RAB5B|FAM219A|ZNF264|MLST8|PNPLA2|NCEH1|NFAT5|GLG1|TANGO2|ZNF398|OSBPL7|NDST1|PLAGL2|SLC25A37|USP49|FKBP14|PHF21A|ANTXR2|EIF2AK2 | TMEM14B|NDUFB5|ZNF529|MKKS|DCUN1D5|RFX7|MTMR9|ZNF302|VPS36|DBT|DEK|FAM96A|SNRPD2|EVI2A|LSM4|AKAP11|CEP44|GMFB|COPS8|LUC7L3|DESI2|ISCA1|PSMA6|UBE2Q2|PCNP|TMEM216|AIDA|PURA|ARL2BP|BRWD1|THUMPD1|GPD1L|MYBL1|RPL27A|BMI1|CCDC90B|IL6ST|TRA2B|VMA21|MTO1|COA1|ARL4C|RPS6|RAB8B|PCMTD1|TMEM170B|CDC40|UBA6|NAA38|TFRC|MTRR|TMED5|TSNAX|ADO|HSF2|CNIH1|ZCCHC17|SUN1|SRSF2|TMEM218|TMEM59|NIF3L1|PLGRKT|ZNF277|07-Mar|CCNG1|C14orf2|TMEM106C|C2CD5|CWC15|RPL23|ZNF451|STARD7|EIF3H|ARMC10|TXNDC17|USPL1|NR3C2|SERBP1|C1orf131|PTGER2|ZNF248|HDAC2|STRAP|BNIP2|FAM107B|CD28|TRAT1|ABHD6|KRAS|SKA2|SP3|KPNA4|GLRX3|RPS27A|KLHL3|RAB21|RAN|VPS4B|OCIAD2|PROSC|MAT2A|PGM2L1|RNF146|CA5B|HNRNPA0|HNRNPH3|CUL2|PMPCB|PTPMT1|AP5M1 |

| miR | pathway | pval | padj | ES | NES | Genes |
| --- | --- | --- | --- | --- | --- | --- |
| miR-619 | HALLMARK_MYC_TARGETS_V1 | 0.001773 | 0.0833333 | -0.513101 | -2.074775 | CLNS1A|BUB3|SRSF7|TRA2B|USP1|DDX21|SRSF1|SERBP1|HDAC2|SRSF3|CNBP|RPL22|  RPL14|RSL1D1 |
| miR-4433b | HALLMARK_E2F_TARGETS | 0.0018939 | 0.0422265 | -0.666484 | -1.950775 | DEK|LUC7L3|TRA2B|NAA38|TFRC|SRSF2 |
| miR-4433b | HALLMARK_MYC_TARGETS_V1 | 0.0019194 | 0.0422265 | -0.608647 | -2.233619 | DEK|SNRPD2|PSMA6|TRA2B|RPS6|ACP1|SRSF2|STARD7|SERBP1|HNRNPA2B1|HDAC2 |
| miR-1273d | HALLMARK_TGF_BETA_SIGNALING | 0.0039841 | 0.1593625 | 1 | 1.3452025 | HIPK2 |
| miR-619 | HALLMARK_APICAL_JUNCTION | 0.0081633 | 0.1918367 | 0.7770383 | 1.8468512 | ZYX|CTNNA1|MSN|MYH9 |
| miR-642 | HALLMARK_OXIDATIVE_PHOSPHORYLATION | 0.0124777 | 0.2245989 | -0.622158 | -1.881507 | NDUFB5|ATP6V1G1|NDUFA4|UQCRQ|NDUFAB1 |
| miR-642 | HALLMARK_NOTCH_SIGNALING | 0.0139721 | 0.2245989 | -0.906459 | -1.591941 | SKP1|RBX1 |
| miR-619 | HALLMARK_INTERFERON_GAMMA_RESPONSE | 0.016055 | 0.2515291 | 0.4663196 | 1.8180623 | ZNFX1|STAT3|HELZ2|FPR1|SP110|MX2|IFNAR2|TRIM21|PML|TRIM25 |
| miR-1273d | HALLMARK_INTERFERON_GAMMA_RESPONSE | 0.0180587 | 0.2472952 | 0.6754967 | 1.8516454 | TAPBP|ADAR|PML|TRIM25|STAT1 |
| miR-642 | HALLMARK_MYC_TARGETS_V1 | 0.0182724 | 0.2245989 | -0.483148 | -1.853404 | RPS3|CLNS1A|SRSF7|DUT|NDUFAB1|TRA2B|RPS6|LSM7|STARD7|SRSF1|SERBP1|SRSF3 |
| miR-1273d | HALLMARK_UNFOLDED_PROTEIN_RESPONSE | 0.0239044 | 0.2472952 | 0.9901961 | 1.3320142 | DCTN1 |
| miR-642 | HALLMARK_INFLAMMATORY_RESPONSE | 0.02407 | 0.2245989 | 0.6179775 | 1.7286521 | MET|ATP2A2|KIF1B|SEMA4D|PTAFR|EIF2AK2 |
| miR-642 | HALLMARK_E2F_TARGETS | 0.0249554 | 0.2245989 | -0.586907 | -1.774905 | LUC7L3|DUT|TRA2B|NAA38|TFRC|SRSF1|CDKN1B|MLH1 |
| miR-4433b | HALLMARK_PI3K_AKT_MTOR_SIGNALING | 0.0251938 | 0.2169625 | 0.8803681 | 1.5538106 | RIPK1|ARF1 |
| miR-4433b | HALLMARK_APOPTOSIS | 0.025641 | 0.2169625 | 0.691358 | 1.6542989 | PAK1|CREBBP|IGF2R|PLCB2 |
| let-7a | HALLMARK_TGF_BETA_SIGNALING | 0.0265306 | 0.687747 | 0.9919355 | 1.3454802 | HIPK2 |
| miR-1273d | HALLMARK_TNFA_SIGNALING_VIA_NFKB | 0.0280778 | 0.2472952 | 0.69967 | 1.7288845 | B4GALT5|SLC2A3|MAP2K3|NFAT5 |
| miR-4433b | HALLMARK_APICAL_JUNCTION | 0.0295276 | 0.2169625 | 0.7692308 | 1.6091283 | ACTN1|MSN|MYH9 |
| miR-4433b | HALLMARK_GLYCOLYSIS | 0.0295858 | 0.2169625 | 0.6760734 | 1.6177254 | G6PD|MET|RBCK1 |
| miR-619 | HALLMARK_P53_PATHWAY | 0.032538 | 0.382321 | 0.5501672 | 1.6825119 | SP1|TM7SF3|CD82|RNF19B|CTSD|FBXW7|ZMAT3 |
| miR-1273d | HALLMARK_E2F_TARGETS | 0.0347107 | 0.2472952 | -0.480296 | -1.608609 | LUC7L3|DUT|STMN1|TRA2B|NAP1L1|NAA38|TFRC |
| miR-1273d | HALLMARK_MYC_TARGETS_V1 | 0.0370943 | 0.2472952 | -0.4 | -1.657407 | DUT|SET|TRA2B|NAP1L1|UBE2E1|HNRNPC|DDX21|HPRT1|STARD7|SRSF1|SERBP1|  HNRNPA2B1|HDAC2|RAN|DDX18|RPL14|RSL1D1 |
| miR-642 | HALLMARK_INTERFERON_GAMMA_RESPONSE | 0.0377358 | 0.2830189 | 0.4174215 | 1.5884295 | STAT3|TRIM26|RBCK1|ADAR|SP110|IFNAR2 |
| miR-642 | HALLMARK_EPITHELIAL_MESENCHYMAL_TRANSITION | 0.047619 | 0.2854123 | 0.8819599 | 1.5426634 | BASP1|ANPEP |
| let-7a | HALLMARK_E2F_TARGETS | 0.0478088 | 0.687747 | -0.869919 | -1.512099 | LUC7L3|NAP1L1 |

Table S6. Functional annotation of target genes.

Table S7. A list of target genes significantly correlated with two miRNAs.

| **miRNA** | **Target gene** | **correlation** | **p-value** | **miRNA** | **Target gene** | **correlation** | **p-value** | **miRNA** | **Target gene** | **correlation** | **p-value** |
| --- | --- | --- | --- | --- | --- | --- | --- | --- | --- | --- | --- |
| hsa-miR-619-5p | DBT | -0.455 | 0.044 | hsa-miR-619-5p | TK2 | 0.509 | 0.022 | hsa-miR-4433b-3p | ANO10 | -0.481 | 0.032 |
| hsa-miR-619-5p | ARL16 | -0.542 | 0.014 | hsa-miR-619-5p | SCRN1 | 0.526 | 0.017 | hsa-miR-4433b-3p | FBXO28 | 0.578 | 0.008 |
| hsa-miR-619-5p | C4orf3 | -0.499 | 0.025 | hsa-miR-619-5p | RPS6KC1 | 0.45 | 0.046 | hsa-miR-4433b-3p | SF3B3 | 0.465 | 0.039 |
| hsa-miR-619-5p | MEMO1 | -0.527 | 0.017 | hsa-miR-619-5p | NCL | 0.462 | 0.04 | hsa-miR-4433b-3p | TM9SF3 | 0.476 | 0.034 |
| hsa-miR-619-5p | CRIPT | -0.46 | 0.041 | hsa-miR-619-5p | TBX19 | 0.462 | 0.04 | hsa-miR-4433b-3p | TNRC6B | 0.596 | 0.006 |
| hsa-miR-619-5p | ZNF511 | -0.536 | 0.015 | hsa-miR-619-5p | IMMT | 0.509 | 0.022 | hsa-miR-4433b-3p | TRIM5 | 0.513 | 0.021 |
| hsa-miR-619-5p | PIAS2 | -0.451 | 0.046 | hsa-miR-619-5p | KIAA0101 | 0.446 | 0.049 | hsa-miR-4433b-3p | ALS2 | 0.46 | 0.041 |
| hsa-miR-619-5p | TRAPPC4 | -0.448 | 0.048 | hsa-miR-619-5p | TP53 | 0.466 | 0.038 | hsa-miR-4433b-3p | FYCO1 | 0.487 | 0.029 |
| hsa-miR-619-5p | RPL18A | -0.449 | 0.047 | hsa-miR-619-5p | RBM28 | 0.461 | 0.041 | hsa-miR-4433b-3p | GNE | 0.531 | 0.016 |
| hsa-miR-619-5p | NDUFB6 | -0.615 | 0.004 | hsa-miR-619-5p | HERPUD2 | 0.513 | 0.021 | hsa-miR-4433b-3p | RETSAT | 0.512 | 0.021 |
| hsa-miR-619-5p | RBM12B | -0.523 | 0.018 | hsa-miR-619-5p | ZNF549 | 0.447 | 0.048 | hsa-miR-4433b-3p | SLFN5 | 0.445 | 0.049 |
| hsa-miR-619-5p | GNB5 | -0.484 | 0.031 | hsa-miR-619-5p | CKAP5 | 0.461 | 0.041 | hsa-miR-4433b-3p | GNB1 | 0.5 | 0.025 |
| hsa-miR-619-5p | P2RY2 | -0.605 | 0.005 | hsa-miR-619-5p | UBE3B | 0.455 | 0.044 | hsa-miR-4433b-3p | KIAA0930 | 0.463 | 0.04 |
| hsa-miR-619-5p | ALKBH1 | -0.517 | 0.02 | hsa-miR-619-5p | THAP11 | 0.475 | 0.034 | hsa-miR-4433b-3p | TCP11L1 | 0.453 | 0.045 |
| hsa-miR-619-5p | PIGV | -0.537 | 0.015 | hsa-miR-619-5p | GOLGA3 | 0.488 | 0.029 | hsa-miR-4433b-3p | DHX40 | 0.446 | 0.049 |
| hsa-miR-619-5p | TACO1 | -0.454 | 0.044 | hsa-miR-619-5p | NCAPD2 | 0.467 | 0.038 | hsa-miR-4433b-3p | SEC61A1 | 0.445 | 0.049 |
| hsa-miR-619-5p | APAF1 | -0.48 | 0.032 | hsa-miR-619-5p | YEATS2 | 0.509 | 0.022 | hsa-miR-4433b-3p | NUP93 | 0.471 | 0.036 |
| hsa-miR-619-5p | MT1F | -0.61 | 0.004 | hsa-miR-619-5p | IGLL1 | 0.627 | 0.003 | hsa-miR-4433b-3p | SPOCK2 | 0.449 | 0.047 |
| hsa-miR-619-5p | ERP44 | -0.489 | 0.029 | hsa-miR-619-5p | GAMT | 0.6 | 0.005 | hsa-miR-4433b-3p | MAPRE1 | 0.479 | 0.033 |
| hsa-miR-619-5p | PDCD11 | -0.614 | 0.004 | hsa-miR-619-5p | CAD | 0.54 | 0.014 | hsa-miR-4433b-3p | FAM177A1 | 0.485 | 0.03 |
| hsa-miR-619-5p | SZRD1 | -0.462 | 0.04 | hsa-miR-619-5p | ALG8 | 0.483 | 0.031 | hsa-miR-4433b-3p | RCC2 | 0.58 | 0.007 |
| hsa-miR-619-5p | CLUAP1 | -0.462 | 0.04 | hsa-miR-619-5p | SPATA5 | 0.562 | 0.01 | hsa-miR-4433b-3p | SBK1 | 0.499 | 0.025 |
| hsa-miR-619-5p | ZNF160 | -0.507 | 0.023 | hsa-miR-619-5p | DHX40 | 0.454 | 0.044 | - | - | - | - |
| hsa-miR-619-5p | CD84 | -0.51 | 0.022 | hsa-miR-619-5p | ARMC8 | 0.447 | 0.048 | - | - | - | - |
| hsa-miR-619-5p | COX6B1 | -0.505 | 0.023 | hsa-miR-619-5p | SRP68 | 0.445 | 0.049 | - | - | - | - |
| hsa-miR-619-5p | ZNF174 | -0.481 | 0.032 | hsa-miR-4433b-3p | LCOR | -0.458 | 0.042 | - | - | - | - |
| hsa-miR-619-5p | NDRG3 | 0.481 | 0.032 | hsa-miR-4433b-3p | DNAJB12 | -0.5 | 0.025 | - | - | - | - |
| hsa-miR-619-5p | ABHD12 | 0.509 | 0.022 | hsa-miR-4433b-3p | DPCD | -0.461 | 0.041 | - | - | - | - |
| hsa-miR-619-5p | ABCF1 | 0.492 | 0.028 | hsa-miR-4433b-3p | HLA-DOA | -0.533 | 0.015 | - | - | - | - |
| hsa-miR-619-5p | PLXNA4 | 0.569 | 0.009 | hsa-miR-4433b-3p | DNPEP | -0.506 | 0.023 | - | - | - | - |
| hsa-miR-619-5p | ATP2A2 | 0.523 | 0.018 | hsa-miR-4433b-3p | SCNM1 | -0.482 | 0.032 | - | - | - | - |
| hsa-miR-619-5p | MYH9 | 0.453 | 0.045 | hsa-miR-4433b-3p | FCRL5 | -0.448 | 0.047 | - | - | - | - |
| hsa-miR-619-5p | HNRNPUL1 | 0.455 | 0.044 | hsa-miR-4433b-3p | TMEM159 | -0.499 | 0.025 | - | - | - | - |
| hsa-miR-619-5p | ELMO2 | 0.684 | 0.001 | hsa-miR-4433b-3p | MRPS18C | -0.465 | 0.039 | - | - | - | - |
| hsa-miR-619-5p | PSMD1 | 0.453 | 0.045 | hsa-miR-4433b-3p | ATOX1 | -0.458 | 0.042 | - | - | - | - |
| hsa-miR-619-5p | ZBTB4 | 0.627 | 0.003 | hsa-miR-4433b-3p | ZNF160 | -0.654 | 0.002 | - | - | - | - |
| hsa-miR-619-5p | PPP2R1A | 0.45 | 0.047 | hsa-miR-4433b-3p | HLA-DOB | -0.555 | 0.011 | - | - | - | - |
| hsa-miR-619-5p | FKBP15 | 0.456 | 0.043 | hsa-miR-4433b-3p | SH3BP2 | -0.488 | 0.029 | - | - | - | - |
| hsa-miR-619-5p | LSG1 | 0.471 | 0.036 | hsa-miR-4433b-3p | DPH3 | -0.453 | 0.045 | - | - | - | - |
| hsa-miR-619-5p | CD68 | 0.485 | 0.03 | hsa-miR-4433b-3p | CXorf38 | -0.548 | 0.012 | - | - | - | - |

The correlation indicates the relationship between miRNA and predicted target gene expression. The calculation of correlation was described in the methods

Table S8. Integrated functional network genes

| Source | Target Attribute | Target | Edge Attribute |
| --- | --- | --- | --- |
| HLA-DOA | KEGG_2019_Human | Inflammatory bowel disease (IBD) | 2.191310203 |
| HLA-DOB | KEGG_2019_Human | Inflammatory bowel disease (IBD) | 2.191310203 |
| ALS2 | MGI_Mammalian_Phenotype_Level_4_2019 | MP:0006082 CNS inflammation | 3.124063001 |
| SH3BP2 | MGI_Mammalian_Phenotype_Level_4_2019 | MP:0006082 CNS inflammation | 3.124063001 |
| SH3BP2 | MGI_Mammalian_Phenotype_Level_4_2019 | MP:0002933 joint inflammation | 1.562205182 |
| SH3BP2 | MGI_Mammalian_Phenotype_Level_4_2019 | MP:0001873 stomach inflammation | 1.281342457 |
| GNE | MGI_Mammalian_Phenotype_Level_4_2019 | MP:0001859 kidney inflammation | 1.021017852 |
| SH3BP2 | MGI_Mammalian_Phenotype_Level_4_2019 | MP:0001846 increased inflammatory response | 0.751747995 |
| SH3BP2 | MGI_Mammalian_Phenotype_Level_4_2019 | MP:0001860 liver inflammation | 0.671441001 |
| SH3BP2 | MGI_Mammalian_Phenotype_Level_4_2019 | MP:0001861 lung inflammation | 0.629320558 |
| GNE | PheWeb_2019 | Noninflammatory disorders of cervix | 1.50862644 |
| FCRL5 | PheWeb_2019 | Inflammatory disease of breast | 1.418412719 |
| GNE | GWAS_Catalog_2019 | Bipolar disorder (inflammation and infection response interaction) | 1.623573783 |
| TM9SF3 | dbGaP | Inflammation | 1.311600195 |
| SH3BP2 | Table_Mining_of_CRISPR_Studies | Autoinflammatory disorder monogenic table summary, PMC6123071 (Table1) | 1.22677827 |
| TP53 | GO_Biological_Process_2018 | entrainment of circadian clock by photoperiod (GO:0043153) | 1.200242582 |
| GNB5 | KEGG_2019_Human | Circadian entrainment | 0.566513943 |
| miR-4433b-3p | FALSE | ZNF160 | 2.698970004 |
| miR-4433b-3p | TRUE | TNRC6B | 2.22184875 |
| miR-4433b-3p | TRUE | RCC2 | 2.15490196 |
| miR-4433b-3p | TRUE | FBXO28 | 2.096910013 |
| miR-4433b-3p | FALSE | HLA-DOB | 1.958607315 |
| miR-4433b-3p | FALSE | CXorf38 | 1.920818754 |
| miR-4433b-3p | FALSE | HLA-DOA | 1.823908741 |
| miR-4433b-3p | TRUE | GNE | 1.795880017 |
| miR-4433b-3p | TRUE | TRIM5 | 1.677780705 |
| miR-4433b-3p | TRUE | RETSAT | 1.677780705 |
| miR-4433b-3p | FALSE | DNPEP | 1.638272164 |
| miR-4433b-3p | FALSE | DNAJB12 | 1.602059991 |
| miR-4433b-3p | FALSE | TMEM159 | 1.602059991 |
| miR-4433b-3p | TRUE | GNB1 | 1.602059991 |
| miR-4433b-3p | TRUE | SBK1 | 1.602059991 |
| miR-4433b-3p | FALSE | SH3BP2 | 1.537602002 |
| miR-4433b-3p | TRUE | FYCO1 | 1.537602002 |
| miR-4433b-3p | TRUE | FAM177A1 | 1.522878745 |
| miR-4433b-3p | FALSE | SCNM1 | 1.494850022 |
| miR-4433b-3p | FALSE | ANO10 | 1.494850022 |
| miR-4433b-3p | TRUE | MAPRE1 | 1.48148606 |
| miR-4433b-3p | TRUE | TM9SF3 | 1.468521083 |
| miR-4433b-3p | TRUE | NUP93 | 1.443697499 |
| miR-4433b-3p | FALSE | MRPS18C | 1.408935393 |
| miR-4433b-3p | TRUE | SF3B3 | 1.408935393 |
| miR-4433b-3p | TRUE | KIAA0930 | 1.397940009 |
| miR-4433b-3p | FALSE | DPCD | 1.387216143 |
| miR-4433b-3p | TRUE | ALS2 | 1.387216143 |
| miR-4433b-3p | FALSE | LCOR | 1.37675071 |
| miR-4433b-3p | FALSE | ATOX1 | 1.37675071 |
| miR-4433b-3p | FALSE | DPH3 | 1.346787486 |
| miR-4433b-3p | TRUE | TCP11L1 | 1.346787486 |
| miR-4433b-3p | FALSE | FCRL5 | 1.327902142 |
| miR-4433b-3p | TRUE | SPOCK2 | 1.327902142 |
| miR-4433b-3p | TRUE | SLFN5 | 1.30980392 |
| miR-4433b-3p | TRUE | DHX40 | 1.30980392 |
| miR-4433b-3p | TRUE | SEC61A1 | 1.30980392 |
| miR-619-5p | TRUE | ELMO2 | 3 |
| miR-619-5p | TRUE | ZBTB4 | 2.522878745 |
| miR-619-5p | TRUE | IGLL1 | 2.522878745 |
| miR-619-5p | FALSE | NDUFB6 | 2.397940009 |
| miR-619-5p | FALSE | MT1F | 2.397940009 |
| miR-619-5p | FALSE | PDCD11 | 2.397940009 |
| miR-619-5p | FALSE | P2RY2 | 2.301029996 |
| miR-619-5p | TRUE | GAMT | 2.301029996 |
| miR-619-5p | TRUE | PLXNA4 | 2.045757491 |
| miR-619-5p | TRUE | SPATA5 | 2 |
| miR-619-5p | FALSE | ARL16 | 1.853871964 |
| miR-619-5p | TRUE | CAD | 1.853871964 |
| miR-619-5p | FALSE | ZNF511 | 1.823908741 |
| miR-619-5p | FALSE | PIGV | 1.823908741 |
| miR-619-5p | FALSE | MEMO1 | 1.769551079 |
| miR-619-5p | TRUE | SCRN1 | 1.769551079 |
| miR-619-5p | FALSE | RBM12B | 1.744727495 |
| miR-619-5p | TRUE | ATP2A2 | 1.744727495 |
| miR-619-5p | FALSE | ALKBH1 | 1.698970004 |
| miR-619-5p | TRUE | HERPUD2 | 1.677780705 |
| miR-619-5p | FALSE | CD84 | 1.657577319 |
| miR-619-5p | TRUE | ABHD12 | 1.657577319 |
| miR-619-5p | TRUE | TK2 | 1.657577319 |
| miR-619-5p | TRUE | IMMT | 1.657577319 |
| miR-619-5p | TRUE | YEATS2 | 1.657577319 |
| miR-619-5p | FALSE | ZNF160 | 1.638272164 |
| miR-619-5p | FALSE | COX6B1 | 1.638272164 |
| miR-619-5p | FALSE | C4orf3 | 1.602059991 |
| miR-619-5p | TRUE | ABCF1 | 1.552841969 |
| miR-619-5p | FALSE | ERP44 | 1.537602002 |
| miR-619-5p | TRUE | GOLGA3 | 1.537602002 |
| miR-619-5p | TRUE | CD68 | 1.522878745 |
| miR-619-5p | FALSE | GNB5 | 1.508638306 |
| miR-619-5p | TRUE | ALG8 | 1.508638306 |
| miR-619-5p | FALSE | APAF1 | 1.494850022 |
| miR-619-5p | FALSE | ZNF174 | 1.494850022 |
| miR-619-5p | TRUE | NDRG3 | 1.494850022 |
| miR-619-5p | TRUE | THAP11 | 1.468521083 |
| miR-619-5p | TRUE | LSG1 | 1.443697499 |
| miR-619-5p | TRUE | TP53 | 1.420216403 |
| miR-619-5p | TRUE | NCAPD2 | 1.420216403 |
| miR-619-5p | FALSE | SZRD1 | 1.397940009 |
| miR-619-5p | FALSE | CLUAP1 | 1.397940009 |
| miR-619-5p | TRUE | NCL | 1.397940009 |
| miR-619-5p | TRUE | TBX19 | 1.397940009 |
| miR-619-5p | FALSE | CRIPT | 1.387216143 |
| miR-619-5p | TRUE | RBM28 | 1.387216143 |
| miR-619-5p | TRUE | CKAP5 | 1.387216143 |
| miR-619-5p | TRUE | FKBP15 | 1.366531544 |
| miR-619-5p | FALSE | DBT | 1.356547324 |
| miR-619-5p | FALSE | TACO1 | 1.356547324 |
| miR-619-5p | TRUE | HNRNPUL1 | 1.356547324 |
| miR-619-5p | TRUE | UBE3B | 1.356547324 |
| miR-619-5p | TRUE | DHX40 | 1.356547324 |
| miR-619-5p | TRUE | MYH9 | 1.346787486 |
| miR-619-5p | TRUE | PSMD1 | 1.346787486 |
| miR-619-5p | FALSE | PIAS2 | 1.337242168 |
| miR-619-5p | TRUE | RPS6KC1 | 1.337242168 |
| miR-619-5p | FALSE | RPL18A | 1.327902142 |
| miR-619-5p | TRUE | PPP2R1A | 1.327902142 |
| miR-619-5p | FALSE | TRAPPC4 | 1.318758763 |
| miR-619-5p | TRUE | ZNF549 | 1.318758763 |
| miR-619-5p | TRUE | ARMC8 | 1.318758763 |
| miR-619-5p | TRUE | KIAA0101 | 1.30980392 |
| miR-619-5p | TRUE | SRP68 | 1.30980392 |


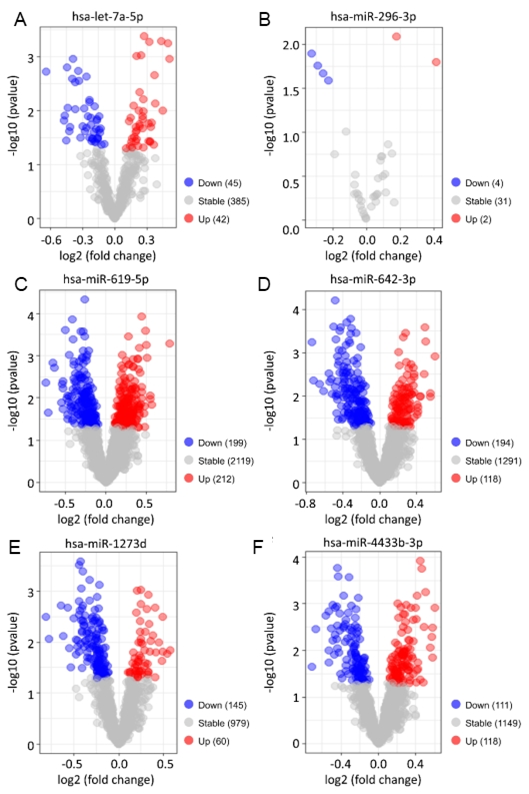


**Figure S1. Volcano plot of differentially expressed target genes for six DEmiRs**. Volcano plot denotes differentially expressed target genes for six miRNAs. The red and blue dots represent up and down regulation in short sleep compared to long sleep.


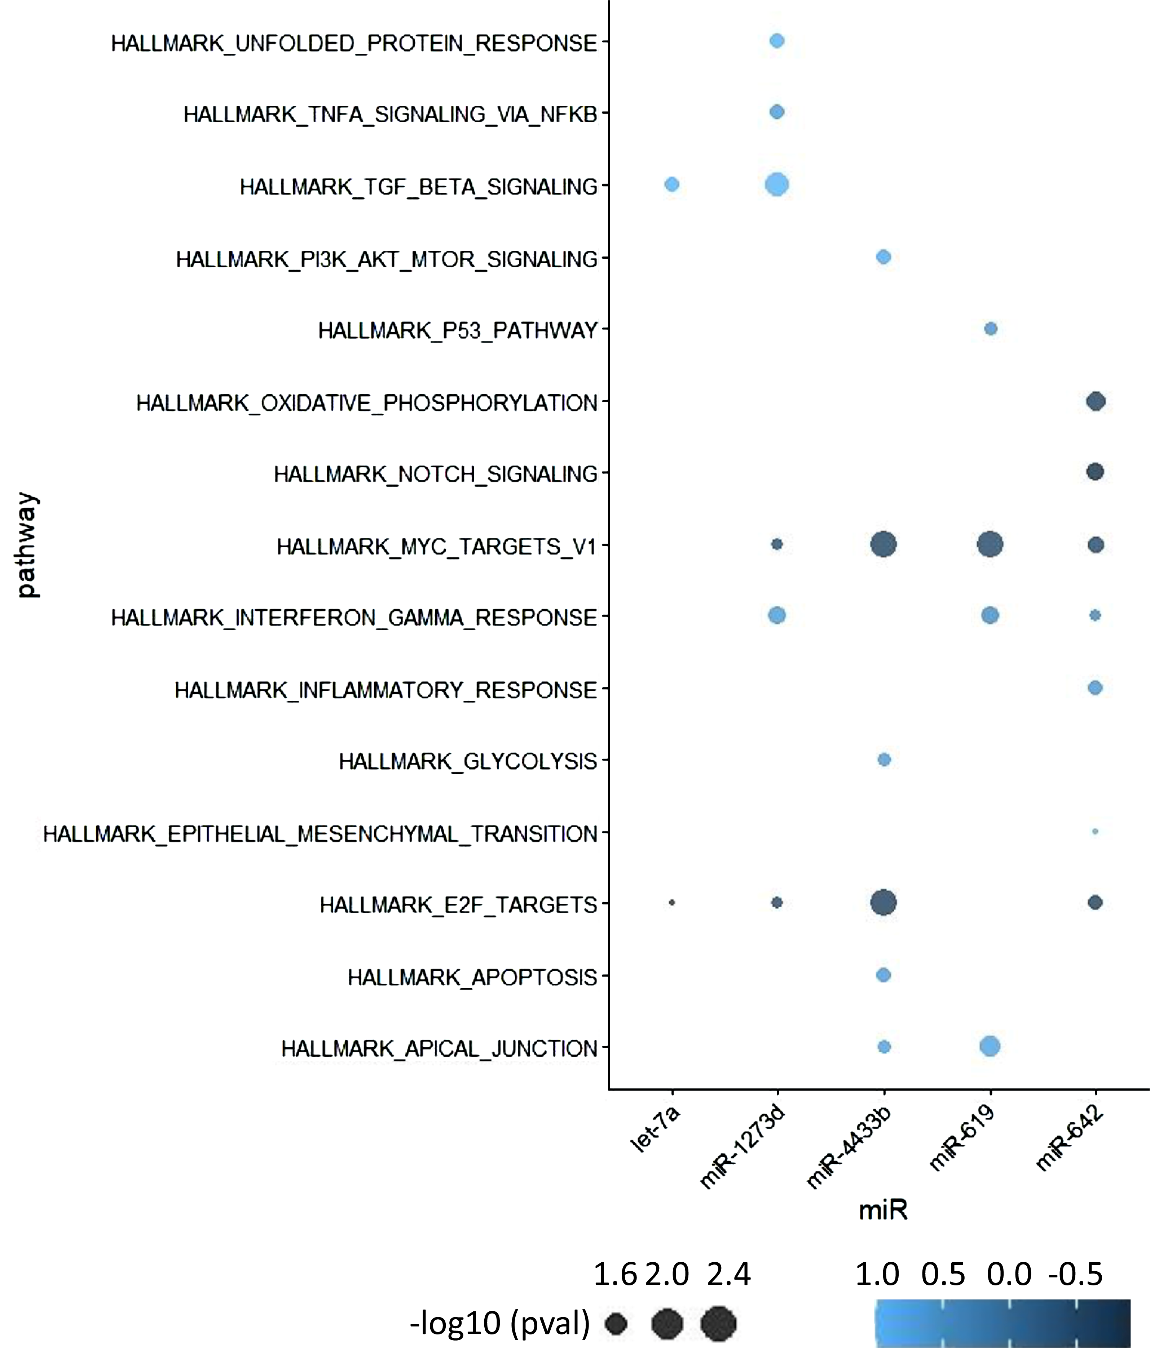


**Figure S2. A dot plot of enriched pathways of differentially expressed target genes for candidate miRNAs.** Each dot demonstrates enriched pathways in differentially expressed target genes by candidate miRNAs. The size of the dot represents statistical significance (-log10(p-value)), and the color represents the enrichment score (ES). There was no significant pathway for miR-296.


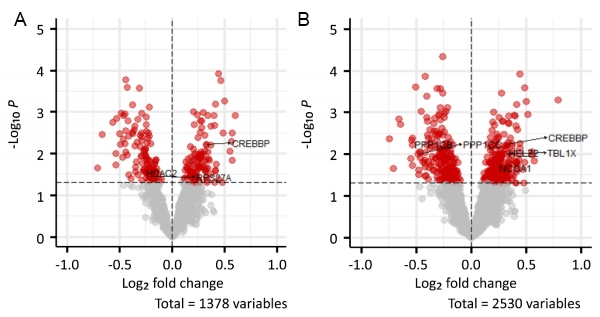


**Figure S3. Volcano plot of circadian rhythm or clock-related target genes for two sleep disorder miRNAs.** The red dots represent differentially expressed target genes for miR-4433b-3p (a) and miR-619-5p (b). The arrows indicate points of circadian rhythm or clock-related genes.

**Reference**

[1] Cho K-H, Cho E-H, Hur J, Shin D. Association of Sleep Duration and Obesity According to Gender and Age in Korean Adults: Results from the Korea National Health and Nutrition Examination Survey 2007–2015. J Korean Med Sci 2018; 33(53): e345.

[2] Zhang H-S, Li Y, Mo H-y, et al. A community-based cross-sectional study of sleep quality in middle-aged and older adults. Qual Life Res 2017 2017; 26(4): 923-33.

[3] Morin CM, Belleville G, Bélanger L, Ivers H. The Insomnia Severity Index: psychometric indicators to detect insomnia cases and evaluate treatment response. Sleep. 2011 May 1;34(5):601-8.

[4] Lee, Youngseop, et al. "Development and validation of an instrument to measure the health status of healthy but unsatisfied people: Mibyeong index (未病 index)." Journal of Society of Preventive Korean Medicine 20.3 (2016): 45-53.
